# Supplementary material for: Single-cell Profiling of Immune cells After Neoadjuvant Pembrolizumab and Chemotherapy in ⅢA non-small cell lung cancer (NSCLC)
Source: Research Square preprint supplement (doi:10.21203/rs.3.rs-952662/v1), 2021-10-12
Supplement: Supplementary file 1 [file 576544554e385259ca0dce14.docx]

| Preoperative treatment | Patient | Age | Sex | Smoking  history | PD-L1  (TPS) | Pathology | RVT% | Pathologic response |
| --- | --- | --- | --- | --- | --- | --- | --- | --- |
| Naive | P01 | 75 | Male | Yes | N/A | AD | N/A | N/A |
| P02 | 65 | Female | No | N/A | AD | N/A | N/A |
| P03 | 73 | Male | Yes | N/A | SCC | N/A | N/A |
| P04 | 58 | Male | No | N/A | AD | N/A | N/A |
| Neoadjuvant | P05 | 59 | Male | Yes | 50% | SCC | 10% | MPR |
| P06 | 69 | Male | Yes | 5% | SCC | 95% | non-MPR |
| P07 | 51 | Female | Yes | 0% | SCC | 0% | MPR |
| P08 | 66 | Female | No | 90% | AD | 80% | non-MPR |
| P09 | 67 | Male | No | 3% | SCC | 0% | MPR |
| P10 | 62 | Male | Yes | 30% | SCC | 0% | MPR |
| P11 | 46 | Male | No | 60% | AD | 60% | non-MPR |
| P12 | 68 | Male | Yes | 15% | SCC | 95% | non-MPR |

**Supplementary Table S2. The basic clinicopathological characteristics of patients.**

PD-L1, programmed cell death-ligand 1; TPS, tumor proportion score; AD, adenocarcinoma; SCC, squamous cell carcinoma; RVT, residual viable tumor cells; N/A, not applicable; MPR, major pathologic response.
