# Supplementary material for: Single-cell Profiling of Immune cells After Neoadjuvant Pembrolizumab and Chemotherapy in ⅢA non-small cell lung cancer (NSCLC)
Source: Research Square preprint supplement (doi:10.21203/rs.3.rs-952662/v1), 2021-10-12
Supplement: Supplementary file 2 [file 5f91972a957eebecd8c95ea9.xlsx]

## Sheet: IL21+差异基因
p_val	avg_logFC	pct.1	pct.2	p_val_adj	cluster	gene
0	2.35476	0.366	0.028	0	IL21+	CXCL13
0	1.59091	1	0	0	IL21+	IL21
0	1.00836	0.604	0.096	0	IL21+	CTLA4
2.79573e-269	0.690636	0.505	0.078	6.58394e-265	IL21+	PDCD1
3.13774e-261	0.569304	0.293	0.029	7.38937e-257	IL21+	TOX2	Tfh
4.46841e-247	1.01825	0.699	0.154	1.05231e-242	IL21+	ICOS
4.69866e-219	1.15874	0.737	0.197	1.10653e-214	IL21+	DUSP4
5.51925e-199	0.314323	0.289	0.036	1.29978e-194	IL21+	ZNRF1
1.47988e-181	1.08683	0.438	0.084	3.48512e-177	IL21+	TNFRSF4
2.02822e-179	0.693744	0.402	0.071	4.77646e-175	IL21+	TNFRSF18
2.08301e-177	0.824851	0.685	0.185	4.90548e-173	IL21+	BATF
2.81054e-168	0.416343	0.364	0.061	6.61883e-164	IL21+	BICDL1
7.99402e-164	0.70082	0.57	0.138	1.88259e-159	IL21+	MAF
2.64572e-156	0.29906	0.295	0.044	6.23068e-152	IL21+	NPDC1
1.65953e-152	0.847421	0.762	0.254	3.90819e-148	IL21+	ITM2A
3.14448e-148	0.589476	0.602	0.163	7.40526e-144	IL21+	HNRNPLL
8.39201e-148	0.530917	0.467	0.103	1.97632e-143	IL21+	CD28
1.45622e-143	0.368107	0.277	0.043	3.4294e-139	IL21+	LINC01943
2.3598e-136	0.3927	0.388	0.079	5.55732e-132	IL21+	TNFRSF25
5.17265e-131	0.740973	0.756	0.266	1.21816e-126	IL21+	ARID5B
6.79439e-129	0.486538	0.495	0.122	1.60008e-124	IL21+	TRAT1
4.8869e-126	0.495648	0.287	0.05	1.15087e-121	IL21+	TSHZ2
2.09083e-124	0.837979	0.764	0.284	4.9239e-120	IL21+	RNF19A
9.71635e-122	0.328394	0.321	0.062	2.2882e-117	IL21+	ADAM19
3.86959e-120	0.536544	0.56	0.158	9.11289e-116	IL21+	PBX4
4.37987e-120	0.44727	0.325	0.064	1.03146e-115	IL21+	CXCR6
4.55485e-119	0.437142	0.374	0.082	1.07267e-114	IL21+	TP53INP1
3.46399e-114	0.461605	0.378	0.087	8.1577e-110	IL21+	TNFSF8
1.5527e-112	0.702695	0.796	0.312	3.65661e-108	IL21+	CD2
2.90856e-112	0.464795	0.473	0.124	6.84965e-108	IL21+	SH2D1A
3.71341e-112	0.55437	0.592	0.185	8.74509e-108	IL21+	GPRIN3
2.14326e-111	0.660347	0.667	0.237	5.04737e-107	IL21+	SNX9
1.9401e-110	0.3703	0.335	0.07	4.56893e-106	IL21+	TOX
5.20171e-110	0.371863	0.384	0.09	1.225e-105	IL21+	CDK6
2.67138e-109	0.44398	0.448	0.118	6.2911e-105	IL21+	GALM
3.05015e-109	0.902629	0.824	0.414	7.1831e-105	IL21+	NR3C1
1.03781e-107	0.46946	0.392	0.093	2.44405e-103	IL21+	TIGIT
4.92848e-105	0.546926	0.669	0.224	1.16066e-100	IL21+	ITK
6.53971e-104	0.554691	0.673	0.232	1.5401e-99	IL21+	CD6
4.04398e-103	0.638881	0.653	0.242	9.52358e-99	IL21+	RBPJ
2.76807e-101	0.61016	0.386	0.095	6.5188e-97	IL21+	IFNG
3.38457e-99	0.424511	0.552	0.169	7.97067e-95	IL21+	CD5
1.07381e-96	0.346793	0.303	0.067	2.52882e-92	IL21+	NAB1
2.53527e-95	0.262795	0.313	0.07	5.97056e-91	IL21+	DUSP16
2.41602e-93	0.67294	0.772	0.33	5.68972e-89	IL21+	SPOCK2
1.52306e-91	0.327772	0.426	0.117	3.58682e-87	IL21+	SFXN1
2.03236e-87	0.399783	0.319	0.076	4.7862e-83	IL21+	CCR6
1.27879e-85	0.258872	0.396	0.107	3.01155e-81	IL21+	P2RY10
3.79404e-85	0.270439	0.406	0.113	8.93497e-81	IL21+	JMY
1.0472e-83	0.395506	0.596	0.206	2.46615e-79	IL21+	CLEC2D
1.5477e-83	0.367505	0.378	0.105	3.64483e-79	IL21+	MAP1LC3A
6.07233e-83	0.464918	0.422	0.13	1.43003e-78	IL21+	GNA15
1.28484e-82	0.32401	0.368	0.102	3.0258e-78	IL21+	PTTG1
2.06092e-82	0.722938	0.707	0.334	4.85346e-78	IL21+	HMGB2
2.1069e-81	0.254145	0.329	0.082	4.96175e-77	IL21+	ZNF831
2.12693e-81	0.261269	0.343	0.089	5.00893e-77	IL21+	TRAF1
2.65216e-81	0.534407	0.39	0.115	6.24583e-77	IL21+	GADD45G
6.93334e-81	0.433101	0.582	0.206	1.6328e-76	IL21+	TENT5C
8.46999e-81	0.576754	0.604	0.221	1.99468e-76	IL21+	RORA
1.05213e-80	0.296644	0.455	0.138	2.47777e-76	IL21+	PPP1R16B
3.12454e-80	0.269438	0.349	0.094	7.35829e-76	IL21+	SMC4
3.74466e-80	0.411901	0.537	0.184	8.81867e-76	IL21+	PIM2
8.15444e-80	0.376117	0.414	0.125	1.92037e-75	IL21+	FAS
3.51395e-79	0.42296	0.255	0.057	8.27536e-75	IL21+	CD40LG
8.61401e-79	0.460736	0.511	0.18	2.0286e-74	IL21+	CD82
1.08828e-78	0.321409	0.525	0.181	2.5629e-74	IL21+	LDLRAD4
5.91435e-77	0.690226	0.747	0.362	1.39283e-72	IL21+	RGS1
6.42542e-77	0.469807	0.61	0.24	1.51319e-72	IL21+	PDCL3
2.60565e-76	0.564217	0.493	0.174	6.1363e-72	IL21+	TMEM173
2.67629e-76	0.319919	0.271	0.065	6.30266e-72	IL21+	MFHAS1
1.32888e-75	0.442799	0.622	0.235	3.12951e-71	IL21+	CBLB
1.06383e-74	0.608769	0.818	0.432	2.50533e-70	IL21+	CREM
1.38031e-74	0.633087	0.64	0.262	3.25062e-70	IL21+	FKBP5
1.41587e-74	0.514913	0.703	0.322	3.33437e-70	IL21+	GSPT1
2.05039e-74	0.677886	0.966	0.838	4.82868e-70	IL21+	SRGN
7.81949e-74	0.305722	0.463	0.148	1.84149e-69	IL21+	TRAC
1.39339e-73	0.49979	0.362	0.105	3.28144e-69	IL21+	LAG3
1.55182e-72	0.498801	0.598	0.239	3.65454e-68	IL21+	SLA
2.63162e-72	0.266123	0.408	0.123	6.19747e-68	IL21+	FAM102A
2.16844e-71	0.36207	0.665	0.267	5.10667e-67	IL21+	CNOT6L
5.1928e-71	0.266955	0.408	0.124	1.2229e-66	IL21+	CXCR3
4.17329e-70	0.623471	0.505	0.185	9.8281e-66	IL21+	IL6ST
6.749e-70	0.276421	0.327	0.089	1.58939e-65	IL21+	INPP4B
7.6302e-70	0.648839	0.307	0.086	1.79691e-65	IL21+	NMB
1.2643e-69	0.464886	0.824	0.394	2.97742e-65	IL21+	CD3D
1.72347e-67	0.388701	0.539	0.206	4.05876e-63	IL21+	BTG3
1.73287e-67	0.477567	0.657	0.281	4.0809e-63	IL21+	PTGER4
1.82931e-67	0.406268	0.477	0.174	4.30802e-63	IL21+	MIR4435-2HG
2.98715e-67	0.325358	0.495	0.179	7.03474e-63	IL21+	PFKFB3
3.05913e-67	0.283522	0.64	0.246	7.20426e-63	IL21+	CD96
3.22059e-67	0.493698	0.598	0.255	7.58449e-63	IL21+	MTHFD2
8.79778e-67	0.276596	0.41	0.133	2.07188e-62	IL21+	ATXN1
1.56833e-66	0.329325	0.446	0.149	3.69343e-62	IL21+	FAM118A
9.75345e-66	0.560887	0.877	0.584	2.29694e-61	IL21+	SOD1
5.06028e-65	0.276966	0.378	0.117	1.1917e-60	IL21+	UHRF2
5.94361e-65	0.423537	0.566	0.224	1.39972e-60	IL21+	NAP1L4
1.36407e-64	0.403584	0.578	0.232	3.21239e-60	IL21+	SOCS1
4.75327e-64	0.506985	0.541	0.214	1.1194e-59	IL21+	CRYBG1
1.73843e-63	0.496051	0.527	0.204	4.094e-59	IL21+	PRDM1
3.00774e-63	0.444181	0.739	0.36	7.08324e-59	IL21+	STAT3
4.85857e-63	0.451473	0.723	0.352	1.14419e-58	IL21+	CACYBP
5.8654e-63	0.266484	0.438	0.15	1.3813e-58	IL21+	TNIK
1.45973e-62	0.463706	0.648	0.285	3.43766e-58	IL21+	ZNF331
2.60357e-62	0.372218	0.515	0.199	6.1314e-58	IL21+	SIAH2
2.87962e-62	0.272426	0.461	0.161	6.7815e-58	IL21+	ATP2B4
6.12256e-62	0.305593	0.428	0.151	1.44186e-57	IL21+	KPNA2
6.97523e-62	0.277675	0.487	0.17	1.64267e-57	IL21+	CAMK4
3.39286e-61	0.417934	0.614	0.264	7.99019e-57	IL21+	NOP58
6.07384e-61	0.353298	0.533	0.208	1.43039e-56	IL21+	SMARCA2
1.90984e-60	0.258896	0.35	0.111	4.49768e-56	IL21+	PHTF2
2.00297e-60	0.270736	0.448	0.156	4.717e-56	IL21+	RAB27A
2.7321e-60	0.371785	0.501	0.197	6.4341e-56	IL21+	DUSP5
3.05137e-60	0.352932	0.584	0.243	7.18598e-56	IL21+	BIRC3
3.47845e-60	0.45708	0.842	0.49	8.19175e-56	IL21+	LEPROTL1
4.52021e-60	0.33208	0.457	0.161	1.06451e-55	IL21+	GATA3
1.79097e-59	0.398397	0.663	0.295	4.21773e-55	IL21+	RHOH
2.32888e-59	0.256936	0.438	0.151	5.48451e-55	IL21+	IKZF3
4.14003e-59	0.36293	0.606	0.262	9.74976e-55	IL21+	SLBP
9.0058e-59	0.362964	0.533	0.215	2.12086e-54	IL21+	FAM129A
3.00761e-58	0.256208	0.372	0.125	7.08291e-54	IL21+	STAT5A
4.37011e-58	0.346608	0.497	0.196	1.02916e-53	IL21+	TANK
1.53438e-57	0.292004	0.481	0.186	3.61346e-53	IL21+	RALA
1.55047e-57	0.452615	0.921	0.499	3.65136e-53	IL21+	CD3E
1.6218e-57	0.400083	0.618	0.277	3.81935e-53	IL21+	CYTOR
2.60401e-57	0.271818	0.37	0.123	6.13244e-53	IL21+	LPIN2
4.35641e-57	0.43369	0.76	0.403	1.02593e-52	IL21+	FAM177A1
6.75787e-57	0.287076	0.461	0.171	1.59148e-52	IL21+	RSBN1
7.54056e-57	0.503942	0.818	0.474	1.7758e-52	IL21+	CYTIP
3.15359e-56	0.466357	0.964	0.811	7.4267e-52	IL21+	SARAF
3.67692e-56	0.251237	0.434	0.155	8.65916e-52	IL21+	RCAN3
4.21785e-56	0.307195	0.515	0.198	9.93304e-52	IL21+	PDE4D
4.37317e-56	0.251177	0.279	0.08	1.02988e-51	IL21+	ITPR1
5.68007e-56	0.349541	0.671	0.299	1.33766e-51	IL21+	AC016831.7
1.42155e-55	0.26303	0.303	0.093	3.34776e-51	IL21+	AHI1
1.9994e-55	0.4413	0.77	0.396	4.70859e-51	IL21+	SAMSN1
6.08592e-55	0.41699	0.699	0.353	1.43323e-50	IL21+	EML4
6.29796e-55	0.256823	0.568	0.236	1.48317e-50	IL21+	TSPYL2
1.10625e-54	0.31445	0.537	0.217	2.60521e-50	IL21+	PBXIP1
1.46182e-54	0.375303	0.634	0.279	3.44258e-50	IL21+	CEMIP2
8.77334e-54	0.283972	0.545	0.224	2.06612e-49	IL21+	NASP
1.56464e-53	0.361862	0.56	0.242	3.68472e-49	IL21+	RHBDD2
2.03104e-53	0.315144	0.402	0.142	4.7831e-49	IL21+	TARSL2
3.84248e-53	0.381092	0.78	0.371	9.04904e-49	IL21+	ETS1
4.34457e-53	0.444518	0.673	0.342	1.02315e-48	IL21+	NDUFV2
4.47164e-53	0.281069	0.473	0.186	1.05307e-48	IL21+	CKS2
4.64479e-53	0.289166	0.57	0.244	1.09385e-48	IL21+	SPTAN1
5.98661e-53	0.325883	0.598	0.262	1.40985e-48	IL21+	SLC7A5
1.3928e-52	0.329632	0.297	0.092	3.28006e-48	IL21+	IPCEF1
2.26889e-52	0.366018	0.729	0.35	5.34323e-48	IL21+	FYN
1.89715e-51	0.571844	0.958	0.784	4.46779e-47	IL21+	HSP90AA1
3.7074e-51	0.350706	0.55	0.24	8.73094e-47	IL21+	PELI1
6.46273e-51	0.389255	0.762	0.397	1.52197e-46	IL21+	STK17A
1.34855e-50	0.297477	0.388	0.144	3.17583e-46	IL21+	DNPH1
1.61655e-50	0.263908	0.345	0.116	3.80699e-46	IL21+	LRBA
7.85008e-50	0.334396	0.735	0.373	1.84869e-45	IL21+	SMAP2
8.92868e-50	0.507137	0.893	0.613	2.1027e-45	IL21+	TNFAIP3
1.63016e-49	0.265171	0.356	0.123	3.83902e-45	IL21+	SMC5
2.3223e-49	0.269544	0.434	0.164	5.46901e-45	IL21+	ARAP2
7.14055e-49	0.33527	0.461	0.19	1.6816e-44	IL21+	GBP2
1.13323e-48	0.433889	0.871	0.562	2.66876e-44	IL21+	COTL1
2.10347e-48	0.354203	0.529	0.236	4.95367e-44	IL21+	CORO1B
5.04942e-48	0.394063	0.725	0.403	1.18914e-43	IL21+	HSPD1
8.68878e-48	0.281535	0.43	0.17	2.04621e-43	IL21+	MIR155HG
1.13314e-47	0.270546	0.459	0.187	2.66855e-43	IL21+	ASXL1
1.35953e-47	0.294672	0.388	0.146	3.2017e-43	IL21+	GRAMD1A
1.76926e-47	0.383078	0.85	0.538	4.16661e-43	IL21+	EZR
3.47319e-47	0.297283	0.6	0.269	8.17937e-43	IL21+	PIK3IP1
1.16549e-46	0.359947	0.703	0.354	2.74472e-42	IL21+	HSPH1
1.25599e-46	0.312203	0.642	0.312	2.95785e-42	IL21+	NSD3
3.51206e-46	0.448879	0.354	0.134	8.2709e-42	IL21+	GK
4.78695e-46	0.31893	0.562	0.256	1.12733e-41	IL21+	PER1
7.33052e-46	0.47166	0.772	0.441	1.72634e-41	IL21+	RGCC
7.42328e-46	0.440884	0.857	0.589	1.74818e-41	IL21+	RAN
1.08093e-45	0.33022	0.347	0.127	2.5456e-41	IL21+	FOXN2
1.5818e-45	0.295847	0.592	0.284	3.72515e-41	IL21+	RELB
1.86279e-45	0.355361	0.677	0.341	4.38687e-41	IL21+	FAM107B
2.62624e-45	0.487264	0.952	0.91	6.18481e-41	IL21+	GAPDH
1.59828e-44	0.262638	0.402	0.158	3.76394e-40	IL21+	AHR
1.63621e-44	0.270192	0.638	0.285	3.85327e-40	IL21+	LCK
3.2836e-44	0.357324	0.61	0.294	7.73287e-40	IL21+	ARID4B
8.98953e-44	0.276064	0.545	0.238	2.11704e-39	IL21+	KLRB1
9.26969e-44	0.270166	0.487	0.21	2.18301e-39	IL21+	PMAIP1
1.19785e-43	0.250039	0.477	0.208	2.82093e-39	IL21+	NUDT21
1.87375e-43	0.30814	0.699	0.362	4.41268e-39	IL21+	FNBP1
3.10411e-43	0.250126	0.554	0.253	7.31018e-39	IL21+	WNK1
3.68312e-43	0.420878	0.97	0.874	8.67376e-39	IL21+	BTG1
3.93064e-43	0.417612	0.782	0.435	9.25665e-39	IL21+	IL7R
8.67404e-43	0.329918	0.788	0.443	2.04274e-38	IL21+	SLC2A3
9.50466e-43	0.301774	0.448	0.19	2.23835e-38	IL21+	SOCS3
2.23933e-42	0.396066	0.812	0.494	5.27363e-38	IL21+	FYB1
2.50386e-42	0.276925	0.572	0.27	5.89658e-38	IL21+	ORAI1
2.86341e-42	0.463375	0.834	0.497	6.74332e-38	IL21+	IL32
3.55377e-42	0.270969	0.632	0.311	8.36912e-38	IL21+	ELOVL5
4.78036e-42	0.299687	0.513	0.227	1.12578e-37	IL21+	CDKN1B
5.69706e-42	0.321507	0.491	0.217	1.34166e-37	IL21+	LYST
6.76763e-42	0.350509	0.59	0.274	1.59378e-37	IL21+	ITGA4
9.32452e-42	0.391317	0.952	0.81	2.19593e-37	IL21+	HSPA8
1.89675e-41	0.410453	0.774	0.464	4.46685e-37	IL21+	DDIT4
2.06476e-41	0.319295	0.707	0.368	4.86252e-37	IL21+	CCNH
6.44828e-41	0.251979	0.578	0.259	1.51857e-36	IL21+	2021-09-01
1.08323e-40	0.280826	0.552	0.256	2.551e-36	IL21+	TNFAIP8
1.38661e-40	0.433561	0.806	0.522	3.26548e-36	IL21+	HSPE1
1.8806e-40	0.257304	0.317	0.116	4.4288e-36	IL21+	ZC3H7A
4.69722e-40	0.25795	0.602	0.295	1.1062e-35	IL21+	KIF5B
8.93681e-40	0.300566	0.693	0.364	2.10462e-35	IL21+	ANKRD12
1.45552e-39	0.324863	0.63	0.326	3.42774e-35	IL21+	RSRC2
1.7144e-39	0.271581	0.305	0.111	4.03741e-35	IL21+	SESN3
2.10465e-39	0.267392	0.426	0.185	4.95644e-35	IL21+	CD4
2.41254e-39	0.313615	0.745	0.432	5.68153e-35	IL21+	WIPF1
4.42463e-39	0.257716	0.535	0.25	1.042e-34	IL21+	IFI16
4.83877e-39	0.286989	0.689	0.347	1.13953e-34	IL21+	TRBC2
6.98063e-39	0.396811	0.871	0.593	1.64394e-34	IL21+	CXCR4
9.38064e-39	0.357183	0.814	0.522	2.20914e-34	IL21+	YPEL5
2.18564e-38	0.331219	0.586	0.29	5.14719e-34	IL21+	ARID5A
5.45109e-38	0.344375	0.857	0.628	1.28373e-33	IL21+	LDHA
1.16724e-37	0.355383	0.713	0.397	2.74886e-33	IL21+	PPP1R2
2.23235e-37	0.290452	0.669	0.357	5.25719e-33	IL21+	JPT1
1.21904e-36	0.251475	0.655	0.347	2.87085e-32	IL21+	MZT2A
1.73166e-36	0.337911	0.721	0.388	4.07805e-32	IL21+	CELF2
1.83464e-36	0.300991	0.622	0.312	4.32058e-32	IL21+	ZC3HAV1
7.59498e-36	0.28674	0.735	0.423	1.78862e-31	IL21+	DDX24
8.06356e-36	0.272361	0.345	0.138	1.89897e-31	IL21+	CCR7
1.08682e-35	0.292719	0.483	0.231	2.55946e-31	IL21+	AHSA1
1.65344e-35	0.382574	0.78	0.475	3.89385e-31	IL21+	EPC1
8.58935e-35	0.250491	0.622	0.318	2.02279e-30	IL21+	2021-09-06
1.09653e-34	0.28811	0.661	0.366	2.58233e-30	IL21+	BHLHE40
1.72855e-34	0.429493	0.907	0.711	4.07073e-30	IL21+	KLF6
3.04672e-34	0.312275	0.723	0.431	7.17502e-30	IL21+	H2AFV
3.17212e-34	0.266779	0.679	0.387	7.47033e-30	IL21+	HNRNPUL1
3.35502e-34	0.307744	0.832	0.502	7.90107e-30	IL21+	CD69
4.49236e-34	0.375576	0.972	0.924	1.05795e-29	IL21+	HLA-A
1.05751e-33	0.315701	0.83	0.559	2.49044e-29	IL21+	SRSF7
1.71167e-33	0.413151	0.952	0.788	4.03097e-29	IL21+	TSC22D3
3.4219e-33	0.29906	0.616	0.329	8.05858e-29	IL21+	PTP4A1
4.91928e-33	0.393857	0.812	0.578	1.15849e-28	IL21+	H2AFZ
5.82256e-33	0.278186	0.705	0.397	1.37121e-28	IL21+	GNG2
1.12838e-32	0.274537	0.673	0.359	2.65734e-28	IL21+	TAGAP
1.25778e-32	-1.40678	0.265	0.468	2.96206e-28	IL21+	TYROBP
1.8966e-32	0.316553	0.857	0.596	4.4665e-28	IL21+	MCL1
2.83549e-32	0.400655	0.935	0.762	6.67759e-28	IL21+	ZFP36L2
3.15774e-32	0.296813	0.745	0.442	7.43647e-28	IL21+	ISG20
4.20791e-32	0.290053	0.808	0.491	9.90963e-28	IL21+	STK17B
4.5575e-32	0.287231	0.774	0.47	1.07329e-27	IL21+	AKAP13
7.90496e-32	0.341215	0.691	0.425	1.86162e-27	IL21+	PGAM1
9.56676e-32	0.33948	0.911	0.72	2.25297e-27	IL21+	HSP90AB1
1.19104e-31	0.279519	0.6	0.331	2.80489e-27	IL21+	H1FX
1.64424e-31	0.271467	0.978	0.927	3.87219e-27	IL21+	H3F3B
1.99603e-31	0.252654	0.628	0.331	4.70065e-27	IL21+	CITED2
9.17264e-31	0.295595	0.697	0.413	2.16016e-26	IL21+	ELF1
2.86243e-30	0.277689	0.703	0.405	6.74103e-26	IL21+	CFLAR
3.46089e-30	0.359356	0.941	0.847	8.15039e-26	IL21+	UBC
4.34007e-30	0.289463	0.917	0.76	1.02209e-25	IL21+	NPM1
1.95849e-29	0.311498	0.543	0.282	4.61225e-25	IL21+	PLIN2
2.7897e-29	0.28039	0.784	0.497	6.56974e-25	IL21+	EIF5
5.25197e-29	0.267737	0.556	0.294	1.23684e-24	IL21+	RBMS1
1.45354e-28	0.317859	0.79	0.543	3.42309e-24	IL21+	SRSF2
1.81665e-28	0.268242	0.903	0.74	4.27822e-24	IL21+	HINT1
6.33498e-28	0.40435	0.725	0.455	1.49189e-23	IL21+	DUSP2
8.21024e-28	0.273563	0.733	0.46	1.93351e-23	IL21+	GYPC
1.79386e-27	0.260095	0.541	0.296	4.22455e-23	IL21+	CNIH1
3.90631e-27	0.267445	0.871	0.693	9.19936e-23	IL21+	SUB1
1.10737e-26	0.374811	0.729	0.469	2.60787e-22	IL21+	PKM
1.61253e-26	0.308213	0.77	0.503	3.7975e-22	IL21+	ZFP36L1
2.05129e-26	0.301779	0.65	0.389	4.83079e-22	IL21+	HSPA1A
4.04329e-26	0.356609	0.82	0.558	9.52195e-22	IL21+	DNAJB1
4.15534e-26	0.255885	0.725	0.457	9.78583e-22	IL21+	UBE2B
4.43843e-26	0.303463	0.687	0.409	1.04525e-21	IL21+	RNF213
1.25344e-25	0.262228	0.881	0.726	2.95184e-21	IL21+	MIF
3.84654e-25	0.280651	0.768	0.505	9.05861e-21	IL21+	SFPQ
4.23095e-24	-1.26147	0.188	0.37	9.96389e-20	IL21+	FCER1G
4.29581e-24	0.260752	0.762	0.522	1.01166e-19	IL21+	HMGN1
5.49522e-24	0.452803	0.537	0.306	1.29412e-19	IL21+	HIST1H4C
6.84492e-24	0.260587	0.764	0.506	1.61198e-19	IL21+	MYH9
8.66631e-24	0.257149	0.693	0.43	2.04092e-19	IL21+	CNN2
9.22136e-24	0.255499	0.745	0.46	2.17163e-19	IL21+	IQGAP1
1.08585e-23	-1.09445	0.968	0.958	2.55718e-19	IL21+	FTL
1.32346e-23	0.272601	0.846	0.658	3.11674e-19	IL21+	YWHAB
1.91646e-23	0.277257	0.709	0.444	4.51327e-19	IL21+	CD7
7.48914e-23	0.266778	0.915	0.804	1.76369e-18	IL21+	ARHGDIB
6.25333e-22	-0.862409	0.836	0.824	1.47266e-17	IL21+	S100A6
6.76551e-22	0.358321	0.432	0.235	1.59328e-17	IL21+	STMN1
1.07554e-19	0.331035	0.933	0.864	2.5329e-15	IL21+	ACTG1
3.11749e-19	0.289266	0.873	0.745	7.34168e-15	IL21+	HMGB1
3.8177e-19	0.299708	0.808	0.602	8.99067e-15	IL21+	TPI1
4.37097e-15	-1.24982	0.22	0.347	1.02936e-10	IL21+	CST3
1.85361e-13	0.280392	0.327	0.185	4.36525e-09	IL21+	CCL4L2
9.30671e-13	-1.6108	0.194	0.308	2.19173e-08	IL21+	LYZ
1.72848e-11	-0.982854	0.156	0.268	4.07058e-07	IL21+	CD68
4.12478e-10	-0.327414	0.879	0.819	9.71385e-06	IL21+	CYBA
2.78144e-09	-0.87606	0.188	0.277	6.55029e-05	IL21+	AIF1
3.16062e-09	-0.565164	0.186	0.274	7.44327e-05	IL21+	C1orf162
4.20843e-09	-0.400884	0.687	0.657	9.91086e-05	IL21+	EMP3
8.11805e-09	-0.685172	0.257	0.324	0.00019118	IL21+	ASAH1
1.25952e-08	-0.541293	0.584	0.55	0.000296616	IL21+	GSTP1
1.84337e-08	-0.289504	0.903	0.86	0.000434114	IL21+	MT-ND4
2.87735e-08	-0.535953	0.174	0.258	0.000677617	IL21+	PLEK
2.88781e-08	0.276588	0.699	0.525	0.000680078	IL21+	TUBA1B
6.01655e-08	0.354153	0.562	0.402	0.0014169	IL21+	TUBB
7.34121e-08	-0.605693	0.307	0.184	0.00172885	IL21+	MT1E
1.30294e-07	-0.35084	0.804	0.744	0.00306842	IL21+	MYL12A
2.6747e-07	-0.330686	0.315	0.187	0.00629892	IL21+	GCHFR
1.02049e-06	-0.870768	0.436	0.423	0.0240326	IL21+	CTSS
3.20811e-06	-0.85795	0.226	0.278	0.075551	IL21+	GRN
5.11299e-06	-0.660899	0.4	0.404	0.120411	IL21+	NPC2
5.79135e-06	-0.452679	0.527	0.341	0.136386	IL21+	CTSB
8.15473e-06	-1.38691	0.251	0.297	0.192044	IL21+	GNLY
1.16684e-05	-0.41712	0.545	0.365	0.274791	IL21+	SOD2
2.17342e-05	-0.892836	0.259	0.3	0.511841	IL21+	IFITM3
5.32061e-05	-0.385767	0.782	0.676	1	IL21+	GABARAP
9.99133e-05	-0.388095	0.584	0.405	1	IL21+	HLA-DRB5
0.00014195	-0.441314	0.301	0.206	1	IL21+	CCL3
0.000187123	-0.258227	0.842	0.743	1	IL21+	ITM2B
0.000195225	-0.485134	0.558	0.374	1	IL21+	HLA-DQB1
0.000261339	-0.456971	0.343	0.235	1	IL21+	AREG
0.000454613	-0.397367	0.626	0.583	1	IL21+	LGALS1
0.000558269	-0.379096	0.295	0.2	1	IL21+	ACP5
0.000650755	-0.27012	0.531	0.36	1	IL21+	TKT
0.000892142	-0.306312	0.681	0.645	1	IL21+	LITAF
0.00242182	-0.730743	0.651	0.537	1	IL21+	PSAP
0.00442514	-0.68099	0.37	0.358	1	IL21+	CTSW
0.00604028	-0.280718	0.261	0.181	1	IL21+	MATK
0.00887386	-0.596576	0.547	0.383	1	IL21+	LGALS3
0	-1.00836	0.096	0.604	0	IL21-	CTLA4
0	-1.59091	0	1	0	IL21-	IL21
0	-2.35476	0.028	0.366	0	IL21-	CXCL13
2.79573e-269	-0.690636	0.078	0.505	6.58394e-265	IL21-	PDCD1
3.13774e-261	-0.569304	0.029	0.293	7.38937e-257	IL21-	TOX2
4.46841e-247	-1.01825	0.154	0.699	1.05231e-242	IL21-	ICOS
4.69866e-219	-1.15874	0.197	0.737	1.10653e-214	IL21-	DUSP4
5.51925e-199	-0.314323	0.036	0.289	1.29978e-194	IL21-	ZNRF1
1.47988e-181	-1.08683	0.084	0.438	3.48512e-177	IL21-	TNFRSF4
2.02822e-179	-0.693744	0.071	0.402	4.77646e-175	IL21-	TNFRSF18
2.08301e-177	-0.824851	0.185	0.685	4.90548e-173	IL21-	BATF
2.81054e-168	-0.416343	0.061	0.364	6.61883e-164	IL21-	BICDL1
7.99402e-164	-0.70082	0.138	0.57	1.88259e-159	IL21-	MAF
2.64572e-156	-0.29906	0.044	0.295	6.23068e-152	IL21-	NPDC1
1.65953e-152	-0.847421	0.254	0.762	3.90819e-148	IL21-	ITM2A
3.14448e-148	-0.589476	0.163	0.602	7.40526e-144	IL21-	HNRNPLL
8.39201e-148	-0.530917	0.103	0.467	1.97632e-143	IL21-	CD28
1.45622e-143	-0.368107	0.043	0.277	3.4294e-139	IL21-	LINC01943
2.3598e-136	-0.3927	0.079	0.388	5.55732e-132	IL21-	TNFRSF25
5.17265e-131	-0.740973	0.266	0.756	1.21816e-126	IL21-	ARID5B
6.79439e-129	-0.486538	0.122	0.495	1.60008e-124	IL21-	TRAT1
4.8869e-126	-0.495648	0.05	0.287	1.15087e-121	IL21-	TSHZ2
2.09083e-124	-0.837979	0.284	0.764	4.9239e-120	IL21-	RNF19A
9.71635e-122	-0.328394	0.062	0.321	2.2882e-117	IL21-	ADAM19
3.86959e-120	-0.536544	0.158	0.56	9.11289e-116	IL21-	PBX4
4.37987e-120	-0.44727	0.064	0.325	1.03146e-115	IL21-	CXCR6
4.55485e-119	-0.437142	0.082	0.374	1.07267e-114	IL21-	TP53INP1
3.46399e-114	-0.461605	0.087	0.378	8.1577e-110	IL21-	TNFSF8
1.5527e-112	-0.702695	0.312	0.796	3.65661e-108	IL21-	CD2
2.90856e-112	-0.464795	0.124	0.473	6.84965e-108	IL21-	SH2D1A
3.71341e-112	-0.55437	0.185	0.592	8.74509e-108	IL21-	GPRIN3
2.14326e-111	-0.660347	0.237	0.667	5.04737e-107	IL21-	SNX9
1.9401e-110	-0.3703	0.07	0.335	4.56893e-106	IL21-	TOX
5.20171e-110	-0.371863	0.09	0.384	1.225e-105	IL21-	CDK6
2.67138e-109	-0.44398	0.118	0.448	6.2911e-105	IL21-	GALM
3.05015e-109	-0.902629	0.414	0.824	7.1831e-105	IL21-	NR3C1
1.03781e-107	-0.46946	0.093	0.392	2.44405e-103	IL21-	TIGIT
4.92848e-105	-0.546926	0.224	0.669	1.16066e-100	IL21-	ITK
6.53971e-104	-0.554691	0.232	0.673	1.5401e-99	IL21-	CD6
4.04398e-103	-0.638881	0.242	0.653	9.52358e-99	IL21-	RBPJ
2.76807e-101	-0.61016	0.095	0.386	6.5188e-97	IL21-	IFNG
3.38457e-99	-0.424511	0.169	0.552	7.97067e-95	IL21-	CD5
1.07381e-96	-0.346793	0.067	0.303	2.52882e-92	IL21-	NAB1
2.53527e-95	-0.262795	0.07	0.313	5.97056e-91	IL21-	DUSP16
2.41602e-93	-0.67294	0.33	0.772	5.68972e-89	IL21-	SPOCK2
1.52306e-91	-0.327772	0.117	0.426	3.58682e-87	IL21-	SFXN1
2.03236e-87	-0.399783	0.076	0.319	4.7862e-83	IL21-	CCR6
1.27879e-85	-0.258872	0.107	0.396	3.01155e-81	IL21-	P2RY10
3.79404e-85	-0.270439	0.113	0.406	8.93497e-81	IL21-	JMY
1.0472e-83	-0.395506	0.206	0.596	2.46615e-79	IL21-	CLEC2D
1.5477e-83	-0.367505	0.105	0.378	3.64483e-79	IL21-	MAP1LC3A
6.07233e-83	-0.464918	0.13	0.422	1.43003e-78	IL21-	GNA15
1.28484e-82	-0.32401	0.102	0.368	3.0258e-78	IL21-	PTTG1
2.06092e-82	-0.722938	0.334	0.707	4.85346e-78	IL21-	HMGB2
2.1069e-81	-0.254145	0.082	0.329	4.96175e-77	IL21-	ZNF831
2.12693e-81	-0.261269	0.089	0.343	5.00893e-77	IL21-	TRAF1
2.65216e-81	-0.534407	0.115	0.39	6.24583e-77	IL21-	GADD45G
6.93334e-81	-0.433101	0.206	0.582	1.6328e-76	IL21-	TENT5C
8.46999e-81	-0.576754	0.221	0.604	1.99468e-76	IL21-	RORA
1.05213e-80	-0.296644	0.138	0.455	2.47777e-76	IL21-	PPP1R16B
3.12454e-80	-0.269438	0.094	0.349	7.35829e-76	IL21-	SMC4
3.74466e-80	-0.411901	0.184	0.537	8.81867e-76	IL21-	PIM2
8.15444e-80	-0.376117	0.125	0.414	1.92037e-75	IL21-	FAS
3.51395e-79	-0.42296	0.057	0.255	8.27536e-75	IL21-	CD40LG
8.61401e-79	-0.460736	0.18	0.511	2.0286e-74	IL21-	CD82
1.08828e-78	-0.321409	0.181	0.525	2.5629e-74	IL21-	LDLRAD4
5.91435e-77	-0.690226	0.362	0.747	1.39283e-72	IL21-	RGS1
6.42542e-77	-0.469807	0.24	0.61	1.51319e-72	IL21-	PDCL3
2.60565e-76	-0.564217	0.174	0.493	6.1363e-72	IL21-	TMEM173
2.67629e-76	-0.319919	0.065	0.271	6.30266e-72	IL21-	MFHAS1
1.32888e-75	-0.442799	0.235	0.622	3.12951e-71	IL21-	CBLB
1.06383e-74	-0.608769	0.432	0.818	2.50533e-70	IL21-	CREM
1.38031e-74	-0.633087	0.262	0.64	3.25062e-70	IL21-	FKBP5
1.41587e-74	-0.514913	0.322	0.703	3.33437e-70	IL21-	GSPT1
2.05039e-74	-0.677886	0.838	0.966	4.82868e-70	IL21-	SRGN
7.81949e-74	-0.305722	0.148	0.463	1.84149e-69	IL21-	TRAC
1.39339e-73	-0.49979	0.105	0.362	3.28144e-69	IL21-	LAG3
1.55182e-72	-0.498801	0.239	0.598	3.65454e-68	IL21-	SLA
2.63162e-72	-0.266123	0.123	0.408	6.19747e-68	IL21-	FAM102A
2.16844e-71	-0.36207	0.267	0.665	5.10667e-67	IL21-	CNOT6L
5.1928e-71	-0.266955	0.124	0.408	1.2229e-66	IL21-	CXCR3
4.17329e-70	-0.623471	0.185	0.505	9.8281e-66	IL21-	IL6ST
6.749e-70	-0.276421	0.089	0.327	1.58939e-65	IL21-	INPP4B
7.6302e-70	-0.648839	0.086	0.307	1.79691e-65	IL21-	NMB
1.2643e-69	-0.464886	0.394	0.824	2.97742e-65	IL21-	CD3D
1.72347e-67	-0.388701	0.206	0.539	4.05876e-63	IL21-	BTG3
1.73287e-67	-0.477567	0.281	0.657	4.0809e-63	IL21-	PTGER4
1.82931e-67	-0.406268	0.174	0.477	4.30802e-63	IL21-	MIR4435-2HG
2.98715e-67	-0.325358	0.179	0.495	7.03474e-63	IL21-	PFKFB3
3.05913e-67	-0.283522	0.246	0.64	7.20426e-63	IL21-	CD96
3.22059e-67	-0.493698	0.255	0.598	7.58449e-63	IL21-	MTHFD2
8.79778e-67	-0.276596	0.133	0.41	2.07188e-62	IL21-	ATXN1
1.56833e-66	-0.329325	0.149	0.446	3.69343e-62	IL21-	FAM118A
9.75345e-66	-0.560887	0.584	0.877	2.29694e-61	IL21-	SOD1
5.06028e-65	-0.276966	0.117	0.378	1.1917e-60	IL21-	UHRF2
5.94361e-65	-0.423537	0.224	0.566	1.39972e-60	IL21-	NAP1L4
1.36407e-64	-0.403584	0.232	0.578	3.21239e-60	IL21-	SOCS1
4.75327e-64	-0.506985	0.214	0.541	1.1194e-59	IL21-	CRYBG1
1.73843e-63	-0.496051	0.204	0.527	4.094e-59	IL21-	PRDM1
3.00774e-63	-0.444181	0.36	0.739	7.08324e-59	IL21-	STAT3
4.85857e-63	-0.451473	0.352	0.723	1.14419e-58	IL21-	CACYBP
5.8654e-63	-0.266484	0.15	0.438	1.3813e-58	IL21-	TNIK
1.45973e-62	-0.463706	0.285	0.648	3.43766e-58	IL21-	ZNF331
2.60357e-62	-0.372218	0.199	0.515	6.1314e-58	IL21-	SIAH2
2.87962e-62	-0.272426	0.161	0.461	6.7815e-58	IL21-	ATP2B4
6.12256e-62	-0.305593	0.151	0.428	1.44186e-57	IL21-	KPNA2
6.97523e-62	-0.277675	0.17	0.487	1.64267e-57	IL21-	CAMK4
3.39286e-61	-0.417934	0.264	0.614	7.99019e-57	IL21-	NOP58
6.07384e-61	-0.353298	0.208	0.533	1.43039e-56	IL21-	SMARCA2
1.90984e-60	-0.258896	0.111	0.35	4.49768e-56	IL21-	PHTF2
2.00297e-60	-0.270736	0.156	0.448	4.717e-56	IL21-	RAB27A
2.7321e-60	-0.371785	0.197	0.501	6.4341e-56	IL21-	DUSP5
3.05137e-60	-0.352932	0.243	0.584	7.18598e-56	IL21-	BIRC3
3.47845e-60	-0.45708	0.49	0.842	8.19175e-56	IL21-	LEPROTL1
4.52021e-60	-0.33208	0.161	0.457	1.06451e-55	IL21-	GATA3
1.79097e-59	-0.398397	0.295	0.663	4.21773e-55	IL21-	RHOH
2.32888e-59	-0.256936	0.151	0.438	5.48451e-55	IL21-	IKZF3
4.14003e-59	-0.36293	0.262	0.606	9.74976e-55	IL21-	SLBP
9.0058e-59	-0.362964	0.215	0.533	2.12086e-54	IL21-	FAM129A
3.00761e-58	-0.256208	0.125	0.372	7.08291e-54	IL21-	STAT5A
4.37011e-58	-0.346608	0.196	0.497	1.02916e-53	IL21-	TANK
1.53438e-57	-0.292004	0.186	0.481	3.61346e-53	IL21-	RALA
1.55047e-57	-0.452615	0.499	0.921	3.65136e-53	IL21-	CD3E
1.6218e-57	-0.400083	0.277	0.618	3.81935e-53	IL21-	CYTOR
2.60401e-57	-0.271818	0.123	0.37	6.13244e-53	IL21-	LPIN2
4.35641e-57	-0.43369	0.403	0.76	1.02593e-52	IL21-	FAM177A1
6.75787e-57	-0.287076	0.171	0.461	1.59148e-52	IL21-	RSBN1
7.54056e-57	-0.503942	0.474	0.818	1.7758e-52	IL21-	CYTIP
3.15359e-56	-0.466357	0.811	0.964	7.4267e-52	IL21-	SARAF
3.67692e-56	-0.251237	0.155	0.434	8.65916e-52	IL21-	RCAN3
4.21785e-56	-0.307195	0.198	0.515	9.93304e-52	IL21-	PDE4D
4.37317e-56	-0.251177	0.08	0.279	1.02988e-51	IL21-	ITPR1
5.68007e-56	-0.349541	0.299	0.671	1.33766e-51	IL21-	AC016831.7
1.42155e-55	-0.26303	0.093	0.303	3.34776e-51	IL21-	AHI1
1.9994e-55	-0.4413	0.396	0.77	4.70859e-51	IL21-	SAMSN1
6.08592e-55	-0.41699	0.353	0.699	1.43323e-50	IL21-	EML4
6.29796e-55	-0.256823	0.236	0.568	1.48317e-50	IL21-	TSPYL2
1.10625e-54	-0.31445	0.217	0.537	2.60521e-50	IL21-	PBXIP1
1.46182e-54	-0.375303	0.279	0.634	3.44258e-50	IL21-	CEMIP2
8.77334e-54	-0.283972	0.224	0.545	2.06612e-49	IL21-	NASP
1.56464e-53	-0.361862	0.242	0.56	3.68472e-49	IL21-	RHBDD2
2.03104e-53	-0.315144	0.142	0.402	4.7831e-49	IL21-	TARSL2
3.84248e-53	-0.381092	0.371	0.78	9.04904e-49	IL21-	ETS1
4.34457e-53	-0.444518	0.342	0.673	1.02315e-48	IL21-	NDUFV2
4.47164e-53	-0.281069	0.186	0.473	1.05307e-48	IL21-	CKS2
4.64479e-53	-0.289166	0.244	0.57	1.09385e-48	IL21-	SPTAN1
5.98661e-53	-0.325883	0.262	0.598	1.40985e-48	IL21-	SLC7A5
1.3928e-52	-0.329632	0.092	0.297	3.28006e-48	IL21-	IPCEF1
2.26889e-52	-0.366018	0.35	0.729	5.34323e-48	IL21-	FYN
1.89715e-51	-0.571844	0.784	0.958	4.46779e-47	IL21-	HSP90AA1
3.7074e-51	-0.350706	0.24	0.55	8.73094e-47	IL21-	PELI1
6.46273e-51	-0.389255	0.397	0.762	1.52197e-46	IL21-	STK17A
1.34855e-50	-0.297477	0.144	0.388	3.17583e-46	IL21-	DNPH1
1.61655e-50	-0.263908	0.116	0.345	3.80699e-46	IL21-	LRBA
7.85008e-50	-0.334396	0.373	0.735	1.84869e-45	IL21-	SMAP2
8.92868e-50	-0.507137	0.613	0.893	2.1027e-45	IL21-	TNFAIP3
1.63016e-49	-0.265171	0.123	0.356	3.83902e-45	IL21-	SMC5
2.3223e-49	-0.269544	0.164	0.434	5.46901e-45	IL21-	ARAP2
7.14055e-49	-0.33527	0.19	0.461	1.6816e-44	IL21-	GBP2
1.13323e-48	-0.433889	0.562	0.871	2.66876e-44	IL21-	COTL1
2.10347e-48	-0.354203	0.236	0.529	4.95367e-44	IL21-	CORO1B
5.04942e-48	-0.394063	0.403	0.725	1.18914e-43	IL21-	HSPD1
8.68878e-48	-0.281535	0.17	0.43	2.04621e-43	IL21-	MIR155HG
1.13314e-47	-0.270546	0.187	0.459	2.66855e-43	IL21-	ASXL1
1.35953e-47	-0.294672	0.146	0.388	3.2017e-43	IL21-	GRAMD1A
1.76926e-47	-0.383078	0.538	0.85	4.16661e-43	IL21-	EZR
3.47319e-47	-0.297283	0.269	0.6	8.17937e-43	IL21-	PIK3IP1
1.16549e-46	-0.359947	0.354	0.703	2.74472e-42	IL21-	HSPH1
1.25599e-46	-0.312203	0.312	0.642	2.95785e-42	IL21-	NSD3
3.51206e-46	-0.448879	0.134	0.354	8.2709e-42	IL21-	GK
4.78695e-46	-0.31893	0.256	0.562	1.12733e-41	IL21-	PER1
7.33052e-46	-0.47166	0.441	0.772	1.72634e-41	IL21-	RGCC
7.42328e-46	-0.440884	0.589	0.857	1.74818e-41	IL21-	RAN
1.08093e-45	-0.33022	0.127	0.347	2.5456e-41	IL21-	FOXN2
1.5818e-45	-0.295847	0.284	0.592	3.72515e-41	IL21-	RELB
1.86279e-45	-0.355361	0.341	0.677	4.38687e-41	IL21-	FAM107B
2.62624e-45	-0.487264	0.91	0.952	6.18481e-41	IL21-	GAPDH
1.59828e-44	-0.262638	0.158	0.402	3.76394e-40	IL21-	AHR
1.63621e-44	-0.270192	0.285	0.638	3.85327e-40	IL21-	LCK
3.2836e-44	-0.357324	0.294	0.61	7.73287e-40	IL21-	ARID4B
8.98953e-44	-0.276064	0.238	0.545	2.11704e-39	IL21-	KLRB1
9.26969e-44	-0.270166	0.21	0.487	2.18301e-39	IL21-	PMAIP1
1.19785e-43	-0.250039	0.208	0.477	2.82093e-39	IL21-	NUDT21
1.87375e-43	-0.30814	0.362	0.699	4.41268e-39	IL21-	FNBP1
3.10411e-43	-0.250126	0.253	0.554	7.31018e-39	IL21-	WNK1
3.68312e-43	-0.420878	0.874	0.97	8.67376e-39	IL21-	BTG1
3.93064e-43	-0.417612	0.435	0.782	9.25665e-39	IL21-	IL7R
8.67404e-43	-0.329918	0.443	0.788	2.04274e-38	IL21-	SLC2A3
9.50466e-43	-0.301774	0.19	0.448	2.23835e-38	IL21-	SOCS3
2.23933e-42	-0.396066	0.494	0.812	5.27363e-38	IL21-	FYB1
2.50386e-42	-0.276925	0.27	0.572	5.89658e-38	IL21-	ORAI1
2.86341e-42	-0.463375	0.497	0.834	6.74332e-38	IL21-	IL32
3.55377e-42	-0.270969	0.311	0.632	8.36912e-38	IL21-	ELOVL5
4.78036e-42	-0.299687	0.227	0.513	1.12578e-37	IL21-	CDKN1B
5.69706e-42	-0.321507	0.217	0.491	1.34166e-37	IL21-	LYST
6.76763e-42	-0.350509	0.274	0.59	1.59378e-37	IL21-	ITGA4
9.32452e-42	-0.391317	0.81	0.952	2.19593e-37	IL21-	HSPA8
1.89675e-41	-0.410453	0.464	0.774	4.46685e-37	IL21-	DDIT4
2.06476e-41	-0.319295	0.368	0.707	4.86252e-37	IL21-	CCNH
6.44828e-41	-0.251979	0.259	0.578	1.51857e-36	IL21-	2021-09-01
1.08323e-40	-0.280826	0.256	0.552	2.551e-36	IL21-	TNFAIP8
1.38661e-40	-0.433561	0.522	0.806	3.26548e-36	IL21-	HSPE1
1.8806e-40	-0.257304	0.116	0.317	4.4288e-36	IL21-	ZC3H7A
4.69722e-40	-0.25795	0.295	0.602	1.1062e-35	IL21-	KIF5B
8.93681e-40	-0.300566	0.364	0.693	2.10462e-35	IL21-	ANKRD12
1.45552e-39	-0.324863	0.326	0.63	3.42774e-35	IL21-	RSRC2
1.7144e-39	-0.271581	0.111	0.305	4.03741e-35	IL21-	SESN3
2.10465e-39	-0.267392	0.185	0.426	4.95644e-35	IL21-	CD4
2.41254e-39	-0.313615	0.432	0.745	5.68153e-35	IL21-	WIPF1
4.42463e-39	-0.257716	0.25	0.535	1.042e-34	IL21-	IFI16
4.83877e-39	-0.286989	0.347	0.689	1.13953e-34	IL21-	TRBC2
6.98063e-39	-0.396811	0.593	0.871	1.64394e-34	IL21-	CXCR4
9.38064e-39	-0.357183	0.522	0.814	2.20914e-34	IL21-	YPEL5
2.18564e-38	-0.331219	0.29	0.586	5.14719e-34	IL21-	ARID5A
5.45109e-38	-0.344375	0.628	0.857	1.28373e-33	IL21-	LDHA
1.16724e-37	-0.355383	0.397	0.713	2.74886e-33	IL21-	PPP1R2
2.23235e-37	-0.290452	0.357	0.669	5.25719e-33	IL21-	JPT1
1.21904e-36	-0.251475	0.347	0.655	2.87085e-32	IL21-	MZT2A
1.73166e-36	-0.337911	0.388	0.721	4.07805e-32	IL21-	CELF2
1.83464e-36	-0.300991	0.312	0.622	4.32058e-32	IL21-	ZC3HAV1
7.59498e-36	-0.28674	0.423	0.735	1.78862e-31	IL21-	DDX24
8.06356e-36	-0.272361	0.138	0.345	1.89897e-31	IL21-	CCR7
1.08682e-35	-0.292719	0.231	0.483	2.55946e-31	IL21-	AHSA1
1.65344e-35	-0.382574	0.475	0.78	3.89385e-31	IL21-	EPC1
8.58935e-35	-0.250491	0.318	0.622	2.02279e-30	IL21-	2021-09-06
1.09653e-34	-0.28811	0.366	0.661	2.58233e-30	IL21-	BHLHE40
1.72855e-34	-0.429493	0.711	0.907	4.07073e-30	IL21-	KLF6
3.04672e-34	-0.312275	0.431	0.723	7.17502e-30	IL21-	H2AFV
3.17212e-34	-0.266779	0.387	0.679	7.47033e-30	IL21-	HNRNPUL1
3.35502e-34	-0.307744	0.502	0.832	7.90107e-30	IL21-	CD69
4.49236e-34	-0.375576	0.924	0.972	1.05795e-29	IL21-	HLA-A
1.05751e-33	-0.315701	0.559	0.83	2.49044e-29	IL21-	SRSF7
1.71167e-33	-0.413151	0.788	0.952	4.03097e-29	IL21-	TSC22D3
3.4219e-33	-0.29906	0.329	0.616	8.05858e-29	IL21-	PTP4A1
4.91928e-33	-0.393857	0.578	0.812	1.15849e-28	IL21-	H2AFZ
5.82256e-33	-0.278186	0.397	0.705	1.37121e-28	IL21-	GNG2
1.12838e-32	-0.274537	0.359	0.673	2.65734e-28	IL21-	TAGAP
1.25778e-32	1.40678	0.468	0.265	2.96206e-28	IL21-	TYROBP
1.8966e-32	-0.316553	0.596	0.857	4.4665e-28	IL21-	MCL1
2.83549e-32	-0.400655	0.762	0.935	6.67759e-28	IL21-	ZFP36L2
3.15774e-32	-0.296813	0.442	0.745	7.43647e-28	IL21-	ISG20
4.20791e-32	-0.290053	0.491	0.808	9.90963e-28	IL21-	STK17B
4.5575e-32	-0.287231	0.47	0.774	1.07329e-27	IL21-	AKAP13
7.90496e-32	-0.341215	0.425	0.691	1.86162e-27	IL21-	PGAM1
9.56676e-32	-0.33948	0.72	0.911	2.25297e-27	IL21-	HSP90AB1
1.19104e-31	-0.279519	0.331	0.6	2.80489e-27	IL21-	H1FX
1.64424e-31	-0.271467	0.927	0.978	3.87219e-27	IL21-	H3F3B
1.99603e-31	-0.252654	0.331	0.628	4.70065e-27	IL21-	CITED2
9.17264e-31	-0.295595	0.413	0.697	2.16016e-26	IL21-	ELF1
2.86243e-30	-0.277689	0.405	0.703	6.74103e-26	IL21-	CFLAR
3.46089e-30	-0.359356	0.847	0.941	8.15039e-26	IL21-	UBC
4.34007e-30	-0.289463	0.76	0.917	1.02209e-25	IL21-	NPM1
1.95849e-29	-0.311498	0.282	0.543	4.61225e-25	IL21-	PLIN2
2.7897e-29	-0.28039	0.497	0.784	6.56974e-25	IL21-	EIF5
5.25197e-29	-0.267737	0.294	0.556	1.23684e-24	IL21-	RBMS1
1.45354e-28	-0.317859	0.543	0.79	3.42309e-24	IL21-	SRSF2
1.81665e-28	-0.268242	0.74	0.903	4.27822e-24	IL21-	HINT1
6.33498e-28	-0.40435	0.455	0.725	1.49189e-23	IL21-	DUSP2
8.21024e-28	-0.273563	0.46	0.733	1.93351e-23	IL21-	GYPC
1.79386e-27	-0.260095	0.296	0.541	4.22455e-23	IL21-	CNIH1
3.90631e-27	-0.267445	0.693	0.871	9.19936e-23	IL21-	SUB1
1.10737e-26	-0.374811	0.469	0.729	2.60787e-22	IL21-	PKM
1.61253e-26	-0.308213	0.503	0.77	3.7975e-22	IL21-	ZFP36L1
2.05129e-26	-0.301779	0.389	0.65	4.83079e-22	IL21-	HSPA1A
4.04329e-26	-0.356609	0.558	0.82	9.52195e-22	IL21-	DNAJB1
4.15534e-26	-0.255885	0.457	0.725	9.78583e-22	IL21-	UBE2B
4.43843e-26	-0.303463	0.409	0.687	1.04525e-21	IL21-	RNF213
1.25344e-25	-0.262228	0.726	0.881	2.95184e-21	IL21-	MIF
3.84654e-25	-0.280651	0.505	0.768	9.05861e-21	IL21-	SFPQ
4.23095e-24	1.26147	0.37	0.188	9.96389e-20	IL21-	FCER1G
4.29581e-24	-0.260752	0.522	0.762	1.01166e-19	IL21-	HMGN1
5.49522e-24	-0.452803	0.306	0.537	1.29412e-19	IL21-	HIST1H4C
6.84492e-24	-0.260587	0.506	0.764	1.61198e-19	IL21-	MYH9
8.66631e-24	-0.257149	0.43	0.693	2.04092e-19	IL21-	CNN2
9.22136e-24	-0.255499	0.46	0.745	2.17163e-19	IL21-	IQGAP1
1.08585e-23	1.09445	0.958	0.968	2.55718e-19	IL21-	FTL
1.32346e-23	-0.272601	0.658	0.846	3.11674e-19	IL21-	YWHAB
1.91646e-23	-0.277257	0.444	0.709	4.51327e-19	IL21-	CD7
7.48914e-23	-0.266778	0.804	0.915	1.76369e-18	IL21-	ARHGDIB
6.25333e-22	0.862409	0.824	0.836	1.47266e-17	IL21-	S100A6
6.76551e-22	-0.358321	0.235	0.432	1.59328e-17	IL21-	STMN1
1.07554e-19	-0.331035	0.864	0.933	2.5329e-15	IL21-	ACTG1
3.11749e-19	-0.289266	0.745	0.873	7.34168e-15	IL21-	HMGB1
3.8177e-19	-0.299708	0.602	0.808	8.99067e-15	IL21-	TPI1
4.37097e-15	1.24982	0.347	0.22	1.02936e-10	IL21-	CST3
1.85361e-13	-0.280392	0.185	0.327	4.36525e-09	IL21-	CCL4L2
9.30671e-13	1.6108	0.308	0.194	2.19173e-08	IL21-	LYZ
1.72848e-11	0.982854	0.268	0.156	4.07058e-07	IL21-	CD68
4.12478e-10	0.327414	0.819	0.879	9.71385e-06	IL21-	CYBA
2.78144e-09	0.87606	0.277	0.188	6.55029e-05	IL21-	AIF1
3.16062e-09	0.565164	0.274	0.186	7.44327e-05	IL21-	C1orf162
4.20843e-09	0.400884	0.657	0.687	9.91086e-05	IL21-	EMP3
8.11805e-09	0.685172	0.324	0.257	0.00019118	IL21-	ASAH1
1.25952e-08	0.541293	0.55	0.584	0.000296616	IL21-	GSTP1
1.84337e-08	0.289504	0.86	0.903	0.000434114	IL21-	MT-ND4
2.87735e-08	0.535953	0.258	0.174	0.000677617	IL21-	PLEK
2.88781e-08	-0.276588	0.525	0.699	0.000680078	IL21-	TUBA1B
6.01655e-08	-0.354153	0.402	0.562	0.0014169	IL21-	TUBB
7.34121e-08	0.605693	0.184	0.307	0.00172885	IL21-	MT1E
1.30294e-07	0.35084	0.744	0.804	0.00306842	IL21-	MYL12A
2.6747e-07	0.330686	0.187	0.315	0.00629892	IL21-	GCHFR
1.02049e-06	0.870768	0.423	0.436	0.0240326	IL21-	CTSS
3.20811e-06	0.85795	0.278	0.226	0.075551	IL21-	GRN
5.11299e-06	0.660899	0.404	0.4	0.120411	IL21-	NPC2
5.79135e-06	0.452679	0.341	0.527	0.136386	IL21-	CTSB
8.15473e-06	1.38691	0.297	0.251	0.192044	IL21-	GNLY
1.16684e-05	0.41712	0.365	0.545	0.274791	IL21-	SOD2
2.17342e-05	0.892836	0.3	0.259	0.511841	IL21-	IFITM3
5.32061e-05	0.385767	0.676	0.782	1	IL21-	GABARAP
9.99133e-05	0.388095	0.405	0.584	1	IL21-	HLA-DRB5
0.00014195	0.441314	0.206	0.301	1	IL21-	CCL3
0.000187123	0.258227	0.743	0.842	1	IL21-	ITM2B
0.000195225	0.485134	0.374	0.558	1	IL21-	HLA-DQB1
0.000261339	0.456971	0.235	0.343	1	IL21-	AREG
0.000454613	0.397367	0.583	0.626	1	IL21-	LGALS1
0.000558269	0.379096	0.2	0.295	1	IL21-	ACP5
0.000650755	0.27012	0.36	0.531	1	IL21-	TKT
0.000892142	0.306312	0.645	0.681	1	IL21-	LITAF
0.00242182	0.730743	0.537	0.651	1	IL21-	PSAP
0.00442514	0.68099	0.358	0.37	1	IL21-	CTSW
0.00604028	0.280718	0.181	0.261	1	IL21-	MATK
0.00887386	0.596576	0.383	0.547	1	IL21-	LGALS3

## Sheet: IL21+
p_val	avg_logFC	pct.1	pct.2	p_val_adj	cluster	gene
0	2.35476	0.366	0.028	0	IL21+	CXCL13
0	1.59091	1	0	0	IL21+	IL21
0	1.00836	0.604	0.096	0	IL21+	CTLA4
2.79573e-269	0.690636	0.505	0.078	6.58394e-265	IL21+	PDCD1
3.13774e-261	0.569304	0.293	0.029	7.38937e-257	IL21+	TOX2
4.46841e-247	1.01825	0.699	0.154	1.05231e-242	IL21+	ICOS
4.69866e-219	1.15874	0.737	0.197	1.10653e-214	IL21+	DUSP4
5.51925e-199	0.314323	0.289	0.036	1.29978e-194	IL21+	ZNRF1
1.47988e-181	1.08683	0.438	0.084	3.48512e-177	IL21+	TNFRSF4
2.02822e-179	0.693744	0.402	0.071	4.77646e-175	IL21+	TNFRSF18
2.08301e-177	0.824851	0.685	0.185	4.90548e-173	IL21+	BATF
2.81054e-168	0.416343	0.364	0.061	6.61883e-164	IL21+	BICDL1
7.99402e-164	0.70082	0.57	0.138	1.88259e-159	IL21+	MAF
2.64572e-156	0.29906	0.295	0.044	6.23068e-152	IL21+	NPDC1
1.65953e-152	0.847421	0.762	0.254	3.90819e-148	IL21+	ITM2A
3.14448e-148	0.589476	0.602	0.163	7.40526e-144	IL21+	HNRNPLL
8.39201e-148	0.530917	0.467	0.103	1.97632e-143	IL21+	CD28
1.45622e-143	0.368107	0.277	0.043	3.4294e-139	IL21+	LINC01943
2.3598e-136	0.3927	0.388	0.079	5.55732e-132	IL21+	TNFRSF25
5.17265e-131	0.740973	0.756	0.266	1.21816e-126	IL21+	ARID5B
6.79439e-129	0.486538	0.495	0.122	1.60008e-124	IL21+	TRAT1
4.8869e-126	0.495648	0.287	0.05	1.15087e-121	IL21+	TSHZ2
2.09083e-124	0.837979	0.764	0.284	4.9239e-120	IL21+	RNF19A
9.71635e-122	0.328394	0.321	0.062	2.2882e-117	IL21+	ADAM19
3.86959e-120	0.536544	0.56	0.158	9.11289e-116	IL21+	PBX4
4.37987e-120	0.44727	0.325	0.064	1.03146e-115	IL21+	CXCR6
4.55485e-119	0.437142	0.374	0.082	1.07267e-114	IL21+	TP53INP1
3.46399e-114	0.461605	0.378	0.087	8.1577e-110	IL21+	TNFSF8
1.5527e-112	0.702695	0.796	0.312	3.65661e-108	IL21+	CD2
2.90856e-112	0.464795	0.473	0.124	6.84965e-108	IL21+	SH2D1A
3.71341e-112	0.55437	0.592	0.185	8.74509e-108	IL21+	GPRIN3
2.14326e-111	0.660347	0.667	0.237	5.04737e-107	IL21+	SNX9
1.9401e-110	0.3703	0.335	0.07	4.56893e-106	IL21+	TOX
5.20171e-110	0.371863	0.384	0.09	1.225e-105	IL21+	CDK6
2.67138e-109	0.44398	0.448	0.118	6.2911e-105	IL21+	GALM
3.05015e-109	0.902629	0.824	0.414	7.1831e-105	IL21+	NR3C1
1.03781e-107	0.46946	0.392	0.093	2.44405e-103	IL21+	TIGIT
4.92848e-105	0.546926	0.669	0.224	1.16066e-100	IL21+	ITK
6.53971e-104	0.554691	0.673	0.232	1.5401e-99	IL21+	CD6
4.04398e-103	0.638881	0.653	0.242	9.52358e-99	IL21+	RBPJ
2.76807e-101	0.61016	0.386	0.095	6.5188e-97	IL21+	IFNG
3.38457e-99	0.424511	0.552	0.169	7.97067e-95	IL21+	CD5
1.07381e-96	0.346793	0.303	0.067	2.52882e-92	IL21+	NAB1
2.53527e-95	0.262795	0.313	0.07	5.97056e-91	IL21+	DUSP16
2.41602e-93	0.67294	0.772	0.33	5.68972e-89	IL21+	SPOCK2
1.52306e-91	0.327772	0.426	0.117	3.58682e-87	IL21+	SFXN1
2.03236e-87	0.399783	0.319	0.076	4.7862e-83	IL21+	CCR6
1.27879e-85	0.258872	0.396	0.107	3.01155e-81	IL21+	P2RY10
3.79404e-85	0.270439	0.406	0.113	8.93497e-81	IL21+	JMY
1.0472e-83	0.395506	0.596	0.206	2.46615e-79	IL21+	CLEC2D
1.5477e-83	0.367505	0.378	0.105	3.64483e-79	IL21+	MAP1LC3A
6.07233e-83	0.464918	0.422	0.13	1.43003e-78	IL21+	GNA15
1.28484e-82	0.32401	0.368	0.102	3.0258e-78	IL21+	PTTG1
2.06092e-82	0.722938	0.707	0.334	4.85346e-78	IL21+	HMGB2
2.1069e-81	0.254145	0.329	0.082	4.96175e-77	IL21+	ZNF831
2.12693e-81	0.261269	0.343	0.089	5.00893e-77	IL21+	TRAF1
2.65216e-81	0.534407	0.39	0.115	6.24583e-77	IL21+	GADD45G
6.93334e-81	0.433101	0.582	0.206	1.6328e-76	IL21+	TENT5C
8.46999e-81	0.576754	0.604	0.221	1.99468e-76	IL21+	RORA
1.05213e-80	0.296644	0.455	0.138	2.47777e-76	IL21+	PPP1R16B
3.12454e-80	0.269438	0.349	0.094	7.35829e-76	IL21+	SMC4
3.74466e-80	0.411901	0.537	0.184	8.81867e-76	IL21+	PIM2
8.15444e-80	0.376117	0.414	0.125	1.92037e-75	IL21+	FAS
3.51395e-79	0.42296	0.255	0.057	8.27536e-75	IL21+	CD40LG
8.61401e-79	0.460736	0.511	0.18	2.0286e-74	IL21+	CD82
1.08828e-78	0.321409	0.525	0.181	2.5629e-74	IL21+	LDLRAD4
5.91435e-77	0.690226	0.747	0.362	1.39283e-72	IL21+	RGS1
6.42542e-77	0.469807	0.61	0.24	1.51319e-72	IL21+	PDCL3
2.60565e-76	0.564217	0.493	0.174	6.1363e-72	IL21+	TMEM173
2.67629e-76	0.319919	0.271	0.065	6.30266e-72	IL21+	MFHAS1
1.32888e-75	0.442799	0.622	0.235	3.12951e-71	IL21+	CBLB
1.06383e-74	0.608769	0.818	0.432	2.50533e-70	IL21+	CREM
1.38031e-74	0.633087	0.64	0.262	3.25062e-70	IL21+	FKBP5
1.41587e-74	0.514913	0.703	0.322	3.33437e-70	IL21+	GSPT1
2.05039e-74	0.677886	0.966	0.838	4.82868e-70	IL21+	SRGN
7.81949e-74	0.305722	0.463	0.148	1.84149e-69	IL21+	TRAC
1.39339e-73	0.49979	0.362	0.105	3.28144e-69	IL21+	LAG3
1.55182e-72	0.498801	0.598	0.239	3.65454e-68	IL21+	SLA
2.63162e-72	0.266123	0.408	0.123	6.19747e-68	IL21+	FAM102A
2.16844e-71	0.36207	0.665	0.267	5.10667e-67	IL21+	CNOT6L
5.1928e-71	0.266955	0.408	0.124	1.2229e-66	IL21+	CXCR3
4.17329e-70	0.623471	0.505	0.185	9.8281e-66	IL21+	IL6ST
6.749e-70	0.276421	0.327	0.089	1.58939e-65	IL21+	INPP4B
7.6302e-70	0.648839	0.307	0.086	1.79691e-65	IL21+	NMB
1.2643e-69	0.464886	0.824	0.394	2.97742e-65	IL21+	CD3D
1.72347e-67	0.388701	0.539	0.206	4.05876e-63	IL21+	BTG3
1.73287e-67	0.477567	0.657	0.281	4.0809e-63	IL21+	PTGER4
1.82931e-67	0.406268	0.477	0.174	4.30802e-63	IL21+	MIR4435-2HG
2.98715e-67	0.325358	0.495	0.179	7.03474e-63	IL21+	PFKFB3
3.05913e-67	0.283522	0.64	0.246	7.20426e-63	IL21+	CD96
3.22059e-67	0.493698	0.598	0.255	7.58449e-63	IL21+	MTHFD2
8.79778e-67	0.276596	0.41	0.133	2.07188e-62	IL21+	ATXN1
1.56833e-66	0.329325	0.446	0.149	3.69343e-62	IL21+	FAM118A
9.75345e-66	0.560887	0.877	0.584	2.29694e-61	IL21+	SOD1
5.06028e-65	0.276966	0.378	0.117	1.1917e-60	IL21+	UHRF2
5.94361e-65	0.423537	0.566	0.224	1.39972e-60	IL21+	NAP1L4
1.36407e-64	0.403584	0.578	0.232	3.21239e-60	IL21+	SOCS1
4.75327e-64	0.506985	0.541	0.214	1.1194e-59	IL21+	CRYBG1
1.73843e-63	0.496051	0.527	0.204	4.094e-59	IL21+	PRDM1
3.00774e-63	0.444181	0.739	0.36	7.08324e-59	IL21+	STAT3
4.85857e-63	0.451473	0.723	0.352	1.14419e-58	IL21+	CACYBP
5.8654e-63	0.266484	0.438	0.15	1.3813e-58	IL21+	TNIK
1.45973e-62	0.463706	0.648	0.285	3.43766e-58	IL21+	ZNF331
2.60357e-62	0.372218	0.515	0.199	6.1314e-58	IL21+	SIAH2
2.87962e-62	0.272426	0.461	0.161	6.7815e-58	IL21+	ATP2B4
6.12256e-62	0.305593	0.428	0.151	1.44186e-57	IL21+	KPNA2
6.97523e-62	0.277675	0.487	0.17	1.64267e-57	IL21+	CAMK4
3.39286e-61	0.417934	0.614	0.264	7.99019e-57	IL21+	NOP58
6.07384e-61	0.353298	0.533	0.208	1.43039e-56	IL21+	SMARCA2
1.90984e-60	0.258896	0.35	0.111	4.49768e-56	IL21+	PHTF2
2.00297e-60	0.270736	0.448	0.156	4.717e-56	IL21+	RAB27A
2.7321e-60	0.371785	0.501	0.197	6.4341e-56	IL21+	DUSP5
3.05137e-60	0.352932	0.584	0.243	7.18598e-56	IL21+	BIRC3
3.47845e-60	0.45708	0.842	0.49	8.19175e-56	IL21+	LEPROTL1
4.52021e-60	0.33208	0.457	0.161	1.06451e-55	IL21+	GATA3
1.79097e-59	0.398397	0.663	0.295	4.21773e-55	IL21+	RHOH
2.32888e-59	0.256936	0.438	0.151	5.48451e-55	IL21+	IKZF3
4.14003e-59	0.36293	0.606	0.262	9.74976e-55	IL21+	SLBP
9.0058e-59	0.362964	0.533	0.215	2.12086e-54	IL21+	FAM129A
3.00761e-58	0.256208	0.372	0.125	7.08291e-54	IL21+	STAT5A
4.37011e-58	0.346608	0.497	0.196	1.02916e-53	IL21+	TANK
1.53438e-57	0.292004	0.481	0.186	3.61346e-53	IL21+	RALA
1.55047e-57	0.452615	0.921	0.499	3.65136e-53	IL21+	CD3E
1.6218e-57	0.400083	0.618	0.277	3.81935e-53	IL21+	CYTOR
2.60401e-57	0.271818	0.37	0.123	6.13244e-53	IL21+	LPIN2
4.35641e-57	0.43369	0.76	0.403	1.02593e-52	IL21+	FAM177A1
6.75787e-57	0.287076	0.461	0.171	1.59148e-52	IL21+	RSBN1
7.54056e-57	0.503942	0.818	0.474	1.7758e-52	IL21+	CYTIP
3.15359e-56	0.466357	0.964	0.811	7.4267e-52	IL21+	SARAF
3.67692e-56	0.251237	0.434	0.155	8.65916e-52	IL21+	RCAN3
4.21785e-56	0.307195	0.515	0.198	9.93304e-52	IL21+	PDE4D
4.37317e-56	0.251177	0.279	0.08	1.02988e-51	IL21+	ITPR1
5.68007e-56	0.349541	0.671	0.299	1.33766e-51	IL21+	AC016831.7
1.42155e-55	0.26303	0.303	0.093	3.34776e-51	IL21+	AHI1
1.9994e-55	0.4413	0.77	0.396	4.70859e-51	IL21+	SAMSN1
6.08592e-55	0.41699	0.699	0.353	1.43323e-50	IL21+	EML4
6.29796e-55	0.256823	0.568	0.236	1.48317e-50	IL21+	TSPYL2
1.10625e-54	0.31445	0.537	0.217	2.60521e-50	IL21+	PBXIP1
1.46182e-54	0.375303	0.634	0.279	3.44258e-50	IL21+	CEMIP2
8.77334e-54	0.283972	0.545	0.224	2.06612e-49	IL21+	NASP
1.56464e-53	0.361862	0.56	0.242	3.68472e-49	IL21+	RHBDD2
2.03104e-53	0.315144	0.402	0.142	4.7831e-49	IL21+	TARSL2
3.84248e-53	0.381092	0.78	0.371	9.04904e-49	IL21+	ETS1
4.34457e-53	0.444518	0.673	0.342	1.02315e-48	IL21+	NDUFV2
4.47164e-53	0.281069	0.473	0.186	1.05307e-48	IL21+	CKS2
4.64479e-53	0.289166	0.57	0.244	1.09385e-48	IL21+	SPTAN1
5.98661e-53	0.325883	0.598	0.262	1.40985e-48	IL21+	SLC7A5
1.3928e-52	0.329632	0.297	0.092	3.28006e-48	IL21+	IPCEF1
2.26889e-52	0.366018	0.729	0.35	5.34323e-48	IL21+	FYN
1.89715e-51	0.571844	0.958	0.784	4.46779e-47	IL21+	HSP90AA1
3.7074e-51	0.350706	0.55	0.24	8.73094e-47	IL21+	PELI1
6.46273e-51	0.389255	0.762	0.397	1.52197e-46	IL21+	STK17A
1.34855e-50	0.297477	0.388	0.144	3.17583e-46	IL21+	DNPH1
1.61655e-50	0.263908	0.345	0.116	3.80699e-46	IL21+	LRBA
7.85008e-50	0.334396	0.735	0.373	1.84869e-45	IL21+	SMAP2
8.92868e-50	0.507137	0.893	0.613	2.1027e-45	IL21+	TNFAIP3
1.63016e-49	0.265171	0.356	0.123	3.83902e-45	IL21+	SMC5
2.3223e-49	0.269544	0.434	0.164	5.46901e-45	IL21+	ARAP2
7.14055e-49	0.33527	0.461	0.19	1.6816e-44	IL21+	GBP2
1.13323e-48	0.433889	0.871	0.562	2.66876e-44	IL21+	COTL1
2.10347e-48	0.354203	0.529	0.236	4.95367e-44	IL21+	CORO1B
5.04942e-48	0.394063	0.725	0.403	1.18914e-43	IL21+	HSPD1
8.68878e-48	0.281535	0.43	0.17	2.04621e-43	IL21+	MIR155HG
1.13314e-47	0.270546	0.459	0.187	2.66855e-43	IL21+	ASXL1
1.35953e-47	0.294672	0.388	0.146	3.2017e-43	IL21+	GRAMD1A
1.76926e-47	0.383078	0.85	0.538	4.16661e-43	IL21+	EZR
3.47319e-47	0.297283	0.6	0.269	8.17937e-43	IL21+	PIK3IP1
1.16549e-46	0.359947	0.703	0.354	2.74472e-42	IL21+	HSPH1
1.25599e-46	0.312203	0.642	0.312	2.95785e-42	IL21+	NSD3
3.51206e-46	0.448879	0.354	0.134	8.2709e-42	IL21+	GK
4.78695e-46	0.31893	0.562	0.256	1.12733e-41	IL21+	PER1
7.33052e-46	0.47166	0.772	0.441	1.72634e-41	IL21+	RGCC
7.42328e-46	0.440884	0.857	0.589	1.74818e-41	IL21+	RAN
1.08093e-45	0.33022	0.347	0.127	2.5456e-41	IL21+	FOXN2
1.5818e-45	0.295847	0.592	0.284	3.72515e-41	IL21+	RELB
1.86279e-45	0.355361	0.677	0.341	4.38687e-41	IL21+	FAM107B
2.62624e-45	0.487264	0.952	0.91	6.18481e-41	IL21+	GAPDH
1.59828e-44	0.262638	0.402	0.158	3.76394e-40	IL21+	AHR
1.63621e-44	0.270192	0.638	0.285	3.85327e-40	IL21+	LCK
3.2836e-44	0.357324	0.61	0.294	7.73287e-40	IL21+	ARID4B
8.98953e-44	0.276064	0.545	0.238	2.11704e-39	IL21+	KLRB1
9.26969e-44	0.270166	0.487	0.21	2.18301e-39	IL21+	PMAIP1
1.19785e-43	0.250039	0.477	0.208	2.82093e-39	IL21+	NUDT21
1.87375e-43	0.30814	0.699	0.362	4.41268e-39	IL21+	FNBP1
3.10411e-43	0.250126	0.554	0.253	7.31018e-39	IL21+	WNK1
3.68312e-43	0.420878	0.97	0.874	8.67376e-39	IL21+	BTG1
3.93064e-43	0.417612	0.782	0.435	9.25665e-39	IL21+	IL7R
8.67404e-43	0.329918	0.788	0.443	2.04274e-38	IL21+	SLC2A3
9.50466e-43	0.301774	0.448	0.19	2.23835e-38	IL21+	SOCS3
2.23933e-42	0.396066	0.812	0.494	5.27363e-38	IL21+	FYB1
2.50386e-42	0.276925	0.572	0.27	5.89658e-38	IL21+	ORAI1
2.86341e-42	0.463375	0.834	0.497	6.74332e-38	IL21+	IL32
3.55377e-42	0.270969	0.632	0.311	8.36912e-38	IL21+	ELOVL5
4.78036e-42	0.299687	0.513	0.227	1.12578e-37	IL21+	CDKN1B
5.69706e-42	0.321507	0.491	0.217	1.34166e-37	IL21+	LYST
6.76763e-42	0.350509	0.59	0.274	1.59378e-37	IL21+	ITGA4
9.32452e-42	0.391317	0.952	0.81	2.19593e-37	IL21+	HSPA8
1.89675e-41	0.410453	0.774	0.464	4.46685e-37	IL21+	DDIT4
2.06476e-41	0.319295	0.707	0.368	4.86252e-37	IL21+	CCNH
6.44828e-41	0.251979	0.578	0.259	1.51857e-36	IL21+	2021-09-01
1.08323e-40	0.280826	0.552	0.256	2.551e-36	IL21+	TNFAIP8
1.38661e-40	0.433561	0.806	0.522	3.26548e-36	IL21+	HSPE1
1.8806e-40	0.257304	0.317	0.116	4.4288e-36	IL21+	ZC3H7A
4.69722e-40	0.25795	0.602	0.295	1.1062e-35	IL21+	KIF5B
8.93681e-40	0.300566	0.693	0.364	2.10462e-35	IL21+	ANKRD12
1.45552e-39	0.324863	0.63	0.326	3.42774e-35	IL21+	RSRC2
1.7144e-39	0.271581	0.305	0.111	4.03741e-35	IL21+	SESN3
2.10465e-39	0.267392	0.426	0.185	4.95644e-35	IL21+	CD4
2.41254e-39	0.313615	0.745	0.432	5.68153e-35	IL21+	WIPF1
4.42463e-39	0.257716	0.535	0.25	1.042e-34	IL21+	IFI16
4.83877e-39	0.286989	0.689	0.347	1.13953e-34	IL21+	TRBC2
6.98063e-39	0.396811	0.871	0.593	1.64394e-34	IL21+	CXCR4
9.38064e-39	0.357183	0.814	0.522	2.20914e-34	IL21+	YPEL5
2.18564e-38	0.331219	0.586	0.29	5.14719e-34	IL21+	ARID5A
5.45109e-38	0.344375	0.857	0.628	1.28373e-33	IL21+	LDHA
1.16724e-37	0.355383	0.713	0.397	2.74886e-33	IL21+	PPP1R2
2.23235e-37	0.290452	0.669	0.357	5.25719e-33	IL21+	JPT1
1.21904e-36	0.251475	0.655	0.347	2.87085e-32	IL21+	MZT2A
1.73166e-36	0.337911	0.721	0.388	4.07805e-32	IL21+	CELF2
1.83464e-36	0.300991	0.622	0.312	4.32058e-32	IL21+	ZC3HAV1
7.59498e-36	0.28674	0.735	0.423	1.78862e-31	IL21+	DDX24
8.06356e-36	0.272361	0.345	0.138	1.89897e-31	IL21+	CCR7
1.08682e-35	0.292719	0.483	0.231	2.55946e-31	IL21+	AHSA1
1.65344e-35	0.382574	0.78	0.475	3.89385e-31	IL21+	EPC1
8.58935e-35	0.250491	0.622	0.318	2.02279e-30	IL21+	2021-09-06
1.09653e-34	0.28811	0.661	0.366	2.58233e-30	IL21+	BHLHE40
1.72855e-34	0.429493	0.907	0.711	4.07073e-30	IL21+	KLF6
3.04672e-34	0.312275	0.723	0.431	7.17502e-30	IL21+	H2AFV
3.17212e-34	0.266779	0.679	0.387	7.47033e-30	IL21+	HNRNPUL1
3.35502e-34	0.307744	0.832	0.502	7.90107e-30	IL21+	CD69
4.49236e-34	0.375576	0.972	0.924	1.05795e-29	IL21+	HLA-A
1.05751e-33	0.315701	0.83	0.559	2.49044e-29	IL21+	SRSF7
1.71167e-33	0.413151	0.952	0.788	4.03097e-29	IL21+	TSC22D3
3.4219e-33	0.29906	0.616	0.329	8.05858e-29	IL21+	PTP4A1
4.91928e-33	0.393857	0.812	0.578	1.15849e-28	IL21+	H2AFZ
5.82256e-33	0.278186	0.705	0.397	1.37121e-28	IL21+	GNG2
1.12838e-32	0.274537	0.673	0.359	2.65734e-28	IL21+	TAGAP
1.25778e-32	-1.40678	0.265	0.468	2.96206e-28	IL21+	TYROBP
1.8966e-32	0.316553	0.857	0.596	4.4665e-28	IL21+	MCL1
2.83549e-32	0.400655	0.935	0.762	6.67759e-28	IL21+	ZFP36L2
3.15774e-32	0.296813	0.745	0.442	7.43647e-28	IL21+	ISG20
4.20791e-32	0.290053	0.808	0.491	9.90963e-28	IL21+	STK17B
4.5575e-32	0.287231	0.774	0.47	1.07329e-27	IL21+	AKAP13
7.90496e-32	0.341215	0.691	0.425	1.86162e-27	IL21+	PGAM1
9.56676e-32	0.33948	0.911	0.72	2.25297e-27	IL21+	HSP90AB1
1.19104e-31	0.279519	0.6	0.331	2.80489e-27	IL21+	H1FX
1.64424e-31	0.271467	0.978	0.927	3.87219e-27	IL21+	H3F3B
1.99603e-31	0.252654	0.628	0.331	4.70065e-27	IL21+	CITED2
9.17264e-31	0.295595	0.697	0.413	2.16016e-26	IL21+	ELF1
2.86243e-30	0.277689	0.703	0.405	6.74103e-26	IL21+	CFLAR
3.46089e-30	0.359356	0.941	0.847	8.15039e-26	IL21+	UBC
4.34007e-30	0.289463	0.917	0.76	1.02209e-25	IL21+	NPM1
1.95849e-29	0.311498	0.543	0.282	4.61225e-25	IL21+	PLIN2
2.7897e-29	0.28039	0.784	0.497	6.56974e-25	IL21+	EIF5
5.25197e-29	0.267737	0.556	0.294	1.23684e-24	IL21+	RBMS1
1.45354e-28	0.317859	0.79	0.543	3.42309e-24	IL21+	SRSF2
1.81665e-28	0.268242	0.903	0.74	4.27822e-24	IL21+	HINT1
6.33498e-28	0.40435	0.725	0.455	1.49189e-23	IL21+	DUSP2
8.21024e-28	0.273563	0.733	0.46	1.93351e-23	IL21+	GYPC
1.79386e-27	0.260095	0.541	0.296	4.22455e-23	IL21+	CNIH1
3.90631e-27	0.267445	0.871	0.693	9.19936e-23	IL21+	SUB1
1.10737e-26	0.374811	0.729	0.469	2.60787e-22	IL21+	PKM
1.61253e-26	0.308213	0.77	0.503	3.7975e-22	IL21+	ZFP36L1
2.05129e-26	0.301779	0.65	0.389	4.83079e-22	IL21+	HSPA1A
4.04329e-26	0.356609	0.82	0.558	9.52195e-22	IL21+	DNAJB1
4.15534e-26	0.255885	0.725	0.457	9.78583e-22	IL21+	UBE2B
4.43843e-26	0.303463	0.687	0.409	1.04525e-21	IL21+	RNF213
1.25344e-25	0.262228	0.881	0.726	2.95184e-21	IL21+	MIF
3.84654e-25	0.280651	0.768	0.505	9.05861e-21	IL21+	SFPQ
4.23095e-24	-1.26147	0.188	0.37	9.96389e-20	IL21+	FCER1G
4.29581e-24	0.260752	0.762	0.522	1.01166e-19	IL21+	HMGN1
5.49522e-24	0.452803	0.537	0.306	1.29412e-19	IL21+	HIST1H4C
6.84492e-24	0.260587	0.764	0.506	1.61198e-19	IL21+	MYH9
8.66631e-24	0.257149	0.693	0.43	2.04092e-19	IL21+	CNN2
9.22136e-24	0.255499	0.745	0.46	2.17163e-19	IL21+	IQGAP1
1.08585e-23	-1.09445	0.968	0.958	2.55718e-19	IL21+	FTL
1.32346e-23	0.272601	0.846	0.658	3.11674e-19	IL21+	YWHAB
1.91646e-23	0.277257	0.709	0.444	4.51327e-19	IL21+	CD7
7.48914e-23	0.266778	0.915	0.804	1.76369e-18	IL21+	ARHGDIB
6.25333e-22	-0.862409	0.836	0.824	1.47266e-17	IL21+	S100A6
6.76551e-22	0.358321	0.432	0.235	1.59328e-17	IL21+	STMN1
1.07554e-19	0.331035	0.933	0.864	2.5329e-15	IL21+	ACTG1
3.11749e-19	0.289266	0.873	0.745	7.34168e-15	IL21+	HMGB1
3.8177e-19	0.299708	0.808	0.602	8.99067e-15	IL21+	TPI1
4.37097e-15	-1.24982	0.22	0.347	1.02936e-10	IL21+	CST3
1.85361e-13	0.280392	0.327	0.185	4.36525e-09	IL21+	CCL4L2
9.30671e-13	-1.6108	0.194	0.308	2.19173e-08	IL21+	LYZ
1.72848e-11	-0.982854	0.156	0.268	4.07058e-07	IL21+	CD68
4.12478e-10	-0.327414	0.879	0.819	9.71385e-06	IL21+	CYBA
2.78144e-09	-0.87606	0.188	0.277	6.55029e-05	IL21+	AIF1
3.16062e-09	-0.565164	0.186	0.274	7.44327e-05	IL21+	C1orf162
4.20843e-09	-0.400884	0.687	0.657	9.91086e-05	IL21+	EMP3
8.11805e-09	-0.685172	0.257	0.324	0.00019118	IL21+	ASAH1
1.25952e-08	-0.541293	0.584	0.55	0.000296616	IL21+	GSTP1
1.84337e-08	-0.289504	0.903	0.86	0.000434114	IL21+	MT-ND4
2.87735e-08	-0.535953	0.174	0.258	0.000677617	IL21+	PLEK
2.88781e-08	0.276588	0.699	0.525	0.000680078	IL21+	TUBA1B
6.01655e-08	0.354153	0.562	0.402	0.0014169	IL21+	TUBB
7.34121e-08	-0.605693	0.307	0.184	0.00172885	IL21+	MT1E
1.30294e-07	-0.35084	0.804	0.744	0.00306842	IL21+	MYL12A
2.6747e-07	-0.330686	0.315	0.187	0.00629892	IL21+	GCHFR
1.02049e-06	-0.870768	0.436	0.423	0.0240326	IL21+	CTSS
3.20811e-06	-0.85795	0.226	0.278	0.075551	IL21+	GRN
5.11299e-06	-0.660899	0.4	0.404	0.120411	IL21+	NPC2
5.79135e-06	-0.452679	0.527	0.341	0.136386	IL21+	CTSB
8.15473e-06	-1.38691	0.251	0.297	0.192044	IL21+	GNLY
1.16684e-05	-0.41712	0.545	0.365	0.274791	IL21+	SOD2
2.17342e-05	-0.892836	0.259	0.3	0.511841	IL21+	IFITM3
5.32061e-05	-0.385767	0.782	0.676	1	IL21+	GABARAP
9.99133e-05	-0.388095	0.584	0.405	1	IL21+	HLA-DRB5
0.00014195	-0.441314	0.301	0.206	1	IL21+	CCL3
0.000187123	-0.258227	0.842	0.743	1	IL21+	ITM2B
0.000195225	-0.485134	0.558	0.374	1	IL21+	HLA-DQB1
0.000261339	-0.456971	0.343	0.235	1	IL21+	AREG
0.000454613	-0.397367	0.626	0.583	1	IL21+	LGALS1
0.000558269	-0.379096	0.295	0.2	1	IL21+	ACP5
0.000650755	-0.27012	0.531	0.36	1	IL21+	TKT
0.000892142	-0.306312	0.681	0.645	1	IL21+	LITAF
0.00242182	-0.730743	0.651	0.537	1	IL21+	PSAP
0.00442514	-0.68099	0.37	0.358	1	IL21+	CTSW
0.00604028	-0.280718	0.261	0.181	1	IL21+	MATK
0.00887386	-0.596576	0.547	0.383	1	IL21+	LGALS3

## Sheet: IL21-
p_val	avg_logFC	pct.1	pct.2	p_val_adj	cluster	gene
0	-1.00836	0.096	0.604	0	IL21-	CTLA4
0	-1.59091	0	1	0	IL21-	IL21
0	-2.35476	0.028	0.366	0	IL21-	CXCL13
2.79573e-269	-0.690636	0.078	0.505	6.58394e-265	IL21-	PDCD1
3.13774e-261	-0.569304	0.029	0.293	7.38937e-257	IL21-	TOX2
4.46841e-247	-1.01825	0.154	0.699	1.05231e-242	IL21-	ICOS
4.69866e-219	-1.15874	0.197	0.737	1.10653e-214	IL21-	DUSP4
5.51925e-199	-0.314323	0.036	0.289	1.29978e-194	IL21-	ZNRF1
1.47988e-181	-1.08683	0.084	0.438	3.48512e-177	IL21-	TNFRSF4
2.02822e-179	-0.693744	0.071	0.402	4.77646e-175	IL21-	TNFRSF18
2.08301e-177	-0.824851	0.185	0.685	4.90548e-173	IL21-	BATF
2.81054e-168	-0.416343	0.061	0.364	6.61883e-164	IL21-	BICDL1
7.99402e-164	-0.70082	0.138	0.57	1.88259e-159	IL21-	MAF
2.64572e-156	-0.29906	0.044	0.295	6.23068e-152	IL21-	NPDC1
1.65953e-152	-0.847421	0.254	0.762	3.90819e-148	IL21-	ITM2A
3.14448e-148	-0.589476	0.163	0.602	7.40526e-144	IL21-	HNRNPLL
8.39201e-148	-0.530917	0.103	0.467	1.97632e-143	IL21-	CD28
1.45622e-143	-0.368107	0.043	0.277	3.4294e-139	IL21-	LINC01943
2.3598e-136	-0.3927	0.079	0.388	5.55732e-132	IL21-	TNFRSF25
5.17265e-131	-0.740973	0.266	0.756	1.21816e-126	IL21-	ARID5B
6.79439e-129	-0.486538	0.122	0.495	1.60008e-124	IL21-	TRAT1
4.8869e-126	-0.495648	0.05	0.287	1.15087e-121	IL21-	TSHZ2
2.09083e-124	-0.837979	0.284	0.764	4.9239e-120	IL21-	RNF19A
9.71635e-122	-0.328394	0.062	0.321	2.2882e-117	IL21-	ADAM19
3.86959e-120	-0.536544	0.158	0.56	9.11289e-116	IL21-	PBX4
4.37987e-120	-0.44727	0.064	0.325	1.03146e-115	IL21-	CXCR6
4.55485e-119	-0.437142	0.082	0.374	1.07267e-114	IL21-	TP53INP1
3.46399e-114	-0.461605	0.087	0.378	8.1577e-110	IL21-	TNFSF8
1.5527e-112	-0.702695	0.312	0.796	3.65661e-108	IL21-	CD2
2.90856e-112	-0.464795	0.124	0.473	6.84965e-108	IL21-	SH2D1A
3.71341e-112	-0.55437	0.185	0.592	8.74509e-108	IL21-	GPRIN3
2.14326e-111	-0.660347	0.237	0.667	5.04737e-107	IL21-	SNX9
1.9401e-110	-0.3703	0.07	0.335	4.56893e-106	IL21-	TOX
5.20171e-110	-0.371863	0.09	0.384	1.225e-105	IL21-	CDK6
2.67138e-109	-0.44398	0.118	0.448	6.2911e-105	IL21-	GALM
3.05015e-109	-0.902629	0.414	0.824	7.1831e-105	IL21-	NR3C1
1.03781e-107	-0.46946	0.093	0.392	2.44405e-103	IL21-	TIGIT
4.92848e-105	-0.546926	0.224	0.669	1.16066e-100	IL21-	ITK
6.53971e-104	-0.554691	0.232	0.673	1.5401e-99	IL21-	CD6
4.04398e-103	-0.638881	0.242	0.653	9.52358e-99	IL21-	RBPJ
2.76807e-101	-0.61016	0.095	0.386	6.5188e-97	IL21-	IFNG
3.38457e-99	-0.424511	0.169	0.552	7.97067e-95	IL21-	CD5
1.07381e-96	-0.346793	0.067	0.303	2.52882e-92	IL21-	NAB1
2.53527e-95	-0.262795	0.07	0.313	5.97056e-91	IL21-	DUSP16
2.41602e-93	-0.67294	0.33	0.772	5.68972e-89	IL21-	SPOCK2
1.52306e-91	-0.327772	0.117	0.426	3.58682e-87	IL21-	SFXN1
2.03236e-87	-0.399783	0.076	0.319	4.7862e-83	IL21-	CCR6
1.27879e-85	-0.258872	0.107	0.396	3.01155e-81	IL21-	P2RY10
3.79404e-85	-0.270439	0.113	0.406	8.93497e-81	IL21-	JMY
1.0472e-83	-0.395506	0.206	0.596	2.46615e-79	IL21-	CLEC2D
1.5477e-83	-0.367505	0.105	0.378	3.64483e-79	IL21-	MAP1LC3A
6.07233e-83	-0.464918	0.13	0.422	1.43003e-78	IL21-	GNA15
1.28484e-82	-0.32401	0.102	0.368	3.0258e-78	IL21-	PTTG1
2.06092e-82	-0.722938	0.334	0.707	4.85346e-78	IL21-	HMGB2
2.1069e-81	-0.254145	0.082	0.329	4.96175e-77	IL21-	ZNF831
2.12693e-81	-0.261269	0.089	0.343	5.00893e-77	IL21-	TRAF1
2.65216e-81	-0.534407	0.115	0.39	6.24583e-77	IL21-	GADD45G
6.93334e-81	-0.433101	0.206	0.582	1.6328e-76	IL21-	TENT5C
8.46999e-81	-0.576754	0.221	0.604	1.99468e-76	IL21-	RORA
1.05213e-80	-0.296644	0.138	0.455	2.47777e-76	IL21-	PPP1R16B
3.12454e-80	-0.269438	0.094	0.349	7.35829e-76	IL21-	SMC4
3.74466e-80	-0.411901	0.184	0.537	8.81867e-76	IL21-	PIM2
8.15444e-80	-0.376117	0.125	0.414	1.92037e-75	IL21-	FAS
3.51395e-79	-0.42296	0.057	0.255	8.27536e-75	IL21-	CD40LG
8.61401e-79	-0.460736	0.18	0.511	2.0286e-74	IL21-	CD82
1.08828e-78	-0.321409	0.181	0.525	2.5629e-74	IL21-	LDLRAD4
5.91435e-77	-0.690226	0.362	0.747	1.39283e-72	IL21-	RGS1
6.42542e-77	-0.469807	0.24	0.61	1.51319e-72	IL21-	PDCL3
2.60565e-76	-0.564217	0.174	0.493	6.1363e-72	IL21-	TMEM173
2.67629e-76	-0.319919	0.065	0.271	6.30266e-72	IL21-	MFHAS1
1.32888e-75	-0.442799	0.235	0.622	3.12951e-71	IL21-	CBLB
1.06383e-74	-0.608769	0.432	0.818	2.50533e-70	IL21-	CREM
1.38031e-74	-0.633087	0.262	0.64	3.25062e-70	IL21-	FKBP5
1.41587e-74	-0.514913	0.322	0.703	3.33437e-70	IL21-	GSPT1
2.05039e-74	-0.677886	0.838	0.966	4.82868e-70	IL21-	SRGN
7.81949e-74	-0.305722	0.148	0.463	1.84149e-69	IL21-	TRAC
1.39339e-73	-0.49979	0.105	0.362	3.28144e-69	IL21-	LAG3
1.55182e-72	-0.498801	0.239	0.598	3.65454e-68	IL21-	SLA
2.63162e-72	-0.266123	0.123	0.408	6.19747e-68	IL21-	FAM102A
2.16844e-71	-0.36207	0.267	0.665	5.10667e-67	IL21-	CNOT6L
5.1928e-71	-0.266955	0.124	0.408	1.2229e-66	IL21-	CXCR3
4.17329e-70	-0.623471	0.185	0.505	9.8281e-66	IL21-	IL6ST
6.749e-70	-0.276421	0.089	0.327	1.58939e-65	IL21-	INPP4B
7.6302e-70	-0.648839	0.086	0.307	1.79691e-65	IL21-	NMB
1.2643e-69	-0.464886	0.394	0.824	2.97742e-65	IL21-	CD3D
1.72347e-67	-0.388701	0.206	0.539	4.05876e-63	IL21-	BTG3
1.73287e-67	-0.477567	0.281	0.657	4.0809e-63	IL21-	PTGER4
1.82931e-67	-0.406268	0.174	0.477	4.30802e-63	IL21-	MIR4435-2HG
2.98715e-67	-0.325358	0.179	0.495	7.03474e-63	IL21-	PFKFB3
3.05913e-67	-0.283522	0.246	0.64	7.20426e-63	IL21-	CD96
3.22059e-67	-0.493698	0.255	0.598	7.58449e-63	IL21-	MTHFD2
8.79778e-67	-0.276596	0.133	0.41	2.07188e-62	IL21-	ATXN1
1.56833e-66	-0.329325	0.149	0.446	3.69343e-62	IL21-	FAM118A
9.75345e-66	-0.560887	0.584	0.877	2.29694e-61	IL21-	SOD1
5.06028e-65	-0.276966	0.117	0.378	1.1917e-60	IL21-	UHRF2
5.94361e-65	-0.423537	0.224	0.566	1.39972e-60	IL21-	NAP1L4
1.36407e-64	-0.403584	0.232	0.578	3.21239e-60	IL21-	SOCS1
4.75327e-64	-0.506985	0.214	0.541	1.1194e-59	IL21-	CRYBG1
1.73843e-63	-0.496051	0.204	0.527	4.094e-59	IL21-	PRDM1
3.00774e-63	-0.444181	0.36	0.739	7.08324e-59	IL21-	STAT3
4.85857e-63	-0.451473	0.352	0.723	1.14419e-58	IL21-	CACYBP
5.8654e-63	-0.266484	0.15	0.438	1.3813e-58	IL21-	TNIK
1.45973e-62	-0.463706	0.285	0.648	3.43766e-58	IL21-	ZNF331
2.60357e-62	-0.372218	0.199	0.515	6.1314e-58	IL21-	SIAH2
2.87962e-62	-0.272426	0.161	0.461	6.7815e-58	IL21-	ATP2B4
6.12256e-62	-0.305593	0.151	0.428	1.44186e-57	IL21-	KPNA2
6.97523e-62	-0.277675	0.17	0.487	1.64267e-57	IL21-	CAMK4
3.39286e-61	-0.417934	0.264	0.614	7.99019e-57	IL21-	NOP58
6.07384e-61	-0.353298	0.208	0.533	1.43039e-56	IL21-	SMARCA2
1.90984e-60	-0.258896	0.111	0.35	4.49768e-56	IL21-	PHTF2
2.00297e-60	-0.270736	0.156	0.448	4.717e-56	IL21-	RAB27A
2.7321e-60	-0.371785	0.197	0.501	6.4341e-56	IL21-	DUSP5
3.05137e-60	-0.352932	0.243	0.584	7.18598e-56	IL21-	BIRC3
3.47845e-60	-0.45708	0.49	0.842	8.19175e-56	IL21-	LEPROTL1
4.52021e-60	-0.33208	0.161	0.457	1.06451e-55	IL21-	GATA3
1.79097e-59	-0.398397	0.295	0.663	4.21773e-55	IL21-	RHOH
2.32888e-59	-0.256936	0.151	0.438	5.48451e-55	IL21-	IKZF3
4.14003e-59	-0.36293	0.262	0.606	9.74976e-55	IL21-	SLBP
9.0058e-59	-0.362964	0.215	0.533	2.12086e-54	IL21-	FAM129A
3.00761e-58	-0.256208	0.125	0.372	7.08291e-54	IL21-	STAT5A
4.37011e-58	-0.346608	0.196	0.497	1.02916e-53	IL21-	TANK
1.53438e-57	-0.292004	0.186	0.481	3.61346e-53	IL21-	RALA
1.55047e-57	-0.452615	0.499	0.921	3.65136e-53	IL21-	CD3E
1.6218e-57	-0.400083	0.277	0.618	3.81935e-53	IL21-	CYTOR
2.60401e-57	-0.271818	0.123	0.37	6.13244e-53	IL21-	LPIN2
4.35641e-57	-0.43369	0.403	0.76	1.02593e-52	IL21-	FAM177A1
6.75787e-57	-0.287076	0.171	0.461	1.59148e-52	IL21-	RSBN1
7.54056e-57	-0.503942	0.474	0.818	1.7758e-52	IL21-	CYTIP
3.15359e-56	-0.466357	0.811	0.964	7.4267e-52	IL21-	SARAF
3.67692e-56	-0.251237	0.155	0.434	8.65916e-52	IL21-	RCAN3
4.21785e-56	-0.307195	0.198	0.515	9.93304e-52	IL21-	PDE4D
4.37317e-56	-0.251177	0.08	0.279	1.02988e-51	IL21-	ITPR1
5.68007e-56	-0.349541	0.299	0.671	1.33766e-51	IL21-	AC016831.7
1.42155e-55	-0.26303	0.093	0.303	3.34776e-51	IL21-	AHI1
1.9994e-55	-0.4413	0.396	0.77	4.70859e-51	IL21-	SAMSN1
6.08592e-55	-0.41699	0.353	0.699	1.43323e-50	IL21-	EML4
6.29796e-55	-0.256823	0.236	0.568	1.48317e-50	IL21-	TSPYL2
1.10625e-54	-0.31445	0.217	0.537	2.60521e-50	IL21-	PBXIP1
1.46182e-54	-0.375303	0.279	0.634	3.44258e-50	IL21-	CEMIP2
8.77334e-54	-0.283972	0.224	0.545	2.06612e-49	IL21-	NASP
1.56464e-53	-0.361862	0.242	0.56	3.68472e-49	IL21-	RHBDD2
2.03104e-53	-0.315144	0.142	0.402	4.7831e-49	IL21-	TARSL2
3.84248e-53	-0.381092	0.371	0.78	9.04904e-49	IL21-	ETS1
4.34457e-53	-0.444518	0.342	0.673	1.02315e-48	IL21-	NDUFV2
4.47164e-53	-0.281069	0.186	0.473	1.05307e-48	IL21-	CKS2
4.64479e-53	-0.289166	0.244	0.57	1.09385e-48	IL21-	SPTAN1
5.98661e-53	-0.325883	0.262	0.598	1.40985e-48	IL21-	SLC7A5
1.3928e-52	-0.329632	0.092	0.297	3.28006e-48	IL21-	IPCEF1
2.26889e-52	-0.366018	0.35	0.729	5.34323e-48	IL21-	FYN
1.89715e-51	-0.571844	0.784	0.958	4.46779e-47	IL21-	HSP90AA1
3.7074e-51	-0.350706	0.24	0.55	8.73094e-47	IL21-	PELI1
6.46273e-51	-0.389255	0.397	0.762	1.52197e-46	IL21-	STK17A
1.34855e-50	-0.297477	0.144	0.388	3.17583e-46	IL21-	DNPH1
1.61655e-50	-0.263908	0.116	0.345	3.80699e-46	IL21-	LRBA
7.85008e-50	-0.334396	0.373	0.735	1.84869e-45	IL21-	SMAP2
8.92868e-50	-0.507137	0.613	0.893	2.1027e-45	IL21-	TNFAIP3
1.63016e-49	-0.265171	0.123	0.356	3.83902e-45	IL21-	SMC5
2.3223e-49	-0.269544	0.164	0.434	5.46901e-45	IL21-	ARAP2
7.14055e-49	-0.33527	0.19	0.461	1.6816e-44	IL21-	GBP2
1.13323e-48	-0.433889	0.562	0.871	2.66876e-44	IL21-	COTL1
2.10347e-48	-0.354203	0.236	0.529	4.95367e-44	IL21-	CORO1B
5.04942e-48	-0.394063	0.403	0.725	1.18914e-43	IL21-	HSPD1
8.68878e-48	-0.281535	0.17	0.43	2.04621e-43	IL21-	MIR155HG
1.13314e-47	-0.270546	0.187	0.459	2.66855e-43	IL21-	ASXL1
1.35953e-47	-0.294672	0.146	0.388	3.2017e-43	IL21-	GRAMD1A
1.76926e-47	-0.383078	0.538	0.85	4.16661e-43	IL21-	EZR
3.47319e-47	-0.297283	0.269	0.6	8.17937e-43	IL21-	PIK3IP1
1.16549e-46	-0.359947	0.354	0.703	2.74472e-42	IL21-	HSPH1
1.25599e-46	-0.312203	0.312	0.642	2.95785e-42	IL21-	NSD3
3.51206e-46	-0.448879	0.134	0.354	8.2709e-42	IL21-	GK
4.78695e-46	-0.31893	0.256	0.562	1.12733e-41	IL21-	PER1
7.33052e-46	-0.47166	0.441	0.772	1.72634e-41	IL21-	RGCC
7.42328e-46	-0.440884	0.589	0.857	1.74818e-41	IL21-	RAN
1.08093e-45	-0.33022	0.127	0.347	2.5456e-41	IL21-	FOXN2
1.5818e-45	-0.295847	0.284	0.592	3.72515e-41	IL21-	RELB
1.86279e-45	-0.355361	0.341	0.677	4.38687e-41	IL21-	FAM107B
2.62624e-45	-0.487264	0.91	0.952	6.18481e-41	IL21-	GAPDH
1.59828e-44	-0.262638	0.158	0.402	3.76394e-40	IL21-	AHR
1.63621e-44	-0.270192	0.285	0.638	3.85327e-40	IL21-	LCK
3.2836e-44	-0.357324	0.294	0.61	7.73287e-40	IL21-	ARID4B
8.98953e-44	-0.276064	0.238	0.545	2.11704e-39	IL21-	KLRB1
9.26969e-44	-0.270166	0.21	0.487	2.18301e-39	IL21-	PMAIP1
1.19785e-43	-0.250039	0.208	0.477	2.82093e-39	IL21-	NUDT21
1.87375e-43	-0.30814	0.362	0.699	4.41268e-39	IL21-	FNBP1
3.10411e-43	-0.250126	0.253	0.554	7.31018e-39	IL21-	WNK1
3.68312e-43	-0.420878	0.874	0.97	8.67376e-39	IL21-	BTG1
3.93064e-43	-0.417612	0.435	0.782	9.25665e-39	IL21-	IL7R
8.67404e-43	-0.329918	0.443	0.788	2.04274e-38	IL21-	SLC2A3
9.50466e-43	-0.301774	0.19	0.448	2.23835e-38	IL21-	SOCS3
2.23933e-42	-0.396066	0.494	0.812	5.27363e-38	IL21-	FYB1
2.50386e-42	-0.276925	0.27	0.572	5.89658e-38	IL21-	ORAI1
2.86341e-42	-0.463375	0.497	0.834	6.74332e-38	IL21-	IL32
3.55377e-42	-0.270969	0.311	0.632	8.36912e-38	IL21-	ELOVL5
4.78036e-42	-0.299687	0.227	0.513	1.12578e-37	IL21-	CDKN1B
5.69706e-42	-0.321507	0.217	0.491	1.34166e-37	IL21-	LYST
6.76763e-42	-0.350509	0.274	0.59	1.59378e-37	IL21-	ITGA4
9.32452e-42	-0.391317	0.81	0.952	2.19593e-37	IL21-	HSPA8
1.89675e-41	-0.410453	0.464	0.774	4.46685e-37	IL21-	DDIT4
2.06476e-41	-0.319295	0.368	0.707	4.86252e-37	IL21-	CCNH
6.44828e-41	-0.251979	0.259	0.578	1.51857e-36	IL21-	2021-09-01
1.08323e-40	-0.280826	0.256	0.552	2.551e-36	IL21-	TNFAIP8
1.38661e-40	-0.433561	0.522	0.806	3.26548e-36	IL21-	HSPE1
1.8806e-40	-0.257304	0.116	0.317	4.4288e-36	IL21-	ZC3H7A
4.69722e-40	-0.25795	0.295	0.602	1.1062e-35	IL21-	KIF5B
8.93681e-40	-0.300566	0.364	0.693	2.10462e-35	IL21-	ANKRD12
1.45552e-39	-0.324863	0.326	0.63	3.42774e-35	IL21-	RSRC2
1.7144e-39	-0.271581	0.111	0.305	4.03741e-35	IL21-	SESN3
2.10465e-39	-0.267392	0.185	0.426	4.95644e-35	IL21-	CD4
2.41254e-39	-0.313615	0.432	0.745	5.68153e-35	IL21-	WIPF1
4.42463e-39	-0.257716	0.25	0.535	1.042e-34	IL21-	IFI16
4.83877e-39	-0.286989	0.347	0.689	1.13953e-34	IL21-	TRBC2
6.98063e-39	-0.396811	0.593	0.871	1.64394e-34	IL21-	CXCR4
9.38064e-39	-0.357183	0.522	0.814	2.20914e-34	IL21-	YPEL5
2.18564e-38	-0.331219	0.29	0.586	5.14719e-34	IL21-	ARID5A
5.45109e-38	-0.344375	0.628	0.857	1.28373e-33	IL21-	LDHA
1.16724e-37	-0.355383	0.397	0.713	2.74886e-33	IL21-	PPP1R2
2.23235e-37	-0.290452	0.357	0.669	5.25719e-33	IL21-	JPT1
1.21904e-36	-0.251475	0.347	0.655	2.87085e-32	IL21-	MZT2A
1.73166e-36	-0.337911	0.388	0.721	4.07805e-32	IL21-	CELF2
1.83464e-36	-0.300991	0.312	0.622	4.32058e-32	IL21-	ZC3HAV1
7.59498e-36	-0.28674	0.423	0.735	1.78862e-31	IL21-	DDX24
8.06356e-36	-0.272361	0.138	0.345	1.89897e-31	IL21-	CCR7
1.08682e-35	-0.292719	0.231	0.483	2.55946e-31	IL21-	AHSA1
1.65344e-35	-0.382574	0.475	0.78	3.89385e-31	IL21-	EPC1
8.58935e-35	-0.250491	0.318	0.622	2.02279e-30	IL21-	2021-09-06
1.09653e-34	-0.28811	0.366	0.661	2.58233e-30	IL21-	BHLHE40
1.72855e-34	-0.429493	0.711	0.907	4.07073e-30	IL21-	KLF6
3.04672e-34	-0.312275	0.431	0.723	7.17502e-30	IL21-	H2AFV
3.17212e-34	-0.266779	0.387	0.679	7.47033e-30	IL21-	HNRNPUL1
3.35502e-34	-0.307744	0.502	0.832	7.90107e-30	IL21-	CD69
4.49236e-34	-0.375576	0.924	0.972	1.05795e-29	IL21-	HLA-A
1.05751e-33	-0.315701	0.559	0.83	2.49044e-29	IL21-	SRSF7
1.71167e-33	-0.413151	0.788	0.952	4.03097e-29	IL21-	TSC22D3
3.4219e-33	-0.29906	0.329	0.616	8.05858e-29	IL21-	PTP4A1
4.91928e-33	-0.393857	0.578	0.812	1.15849e-28	IL21-	H2AFZ
5.82256e-33	-0.278186	0.397	0.705	1.37121e-28	IL21-	GNG2
1.12838e-32	-0.274537	0.359	0.673	2.65734e-28	IL21-	TAGAP
1.25778e-32	1.40678	0.468	0.265	2.96206e-28	IL21-	TYROBP
1.8966e-32	-0.316553	0.596	0.857	4.4665e-28	IL21-	MCL1
2.83549e-32	-0.400655	0.762	0.935	6.67759e-28	IL21-	ZFP36L2
3.15774e-32	-0.296813	0.442	0.745	7.43647e-28	IL21-	ISG20
4.20791e-32	-0.290053	0.491	0.808	9.90963e-28	IL21-	STK17B
4.5575e-32	-0.287231	0.47	0.774	1.07329e-27	IL21-	AKAP13
7.90496e-32	-0.341215	0.425	0.691	1.86162e-27	IL21-	PGAM1
9.56676e-32	-0.33948	0.72	0.911	2.25297e-27	IL21-	HSP90AB1
1.19104e-31	-0.279519	0.331	0.6	2.80489e-27	IL21-	H1FX
1.64424e-31	-0.271467	0.927	0.978	3.87219e-27	IL21-	H3F3B
1.99603e-31	-0.252654	0.331	0.628	4.70065e-27	IL21-	CITED2
9.17264e-31	-0.295595	0.413	0.697	2.16016e-26	IL21-	ELF1
2.86243e-30	-0.277689	0.405	0.703	6.74103e-26	IL21-	CFLAR
3.46089e-30	-0.359356	0.847	0.941	8.15039e-26	IL21-	UBC
4.34007e-30	-0.289463	0.76	0.917	1.02209e-25	IL21-	NPM1
1.95849e-29	-0.311498	0.282	0.543	4.61225e-25	IL21-	PLIN2
2.7897e-29	-0.28039	0.497	0.784	6.56974e-25	IL21-	EIF5
5.25197e-29	-0.267737	0.294	0.556	1.23684e-24	IL21-	RBMS1
1.45354e-28	-0.317859	0.543	0.79	3.42309e-24	IL21-	SRSF2
1.81665e-28	-0.268242	0.74	0.903	4.27822e-24	IL21-	HINT1
6.33498e-28	-0.40435	0.455	0.725	1.49189e-23	IL21-	DUSP2
8.21024e-28	-0.273563	0.46	0.733	1.93351e-23	IL21-	GYPC
1.79386e-27	-0.260095	0.296	0.541	4.22455e-23	IL21-	CNIH1
3.90631e-27	-0.267445	0.693	0.871	9.19936e-23	IL21-	SUB1
1.10737e-26	-0.374811	0.469	0.729	2.60787e-22	IL21-	PKM
1.61253e-26	-0.308213	0.503	0.77	3.7975e-22	IL21-	ZFP36L1
2.05129e-26	-0.301779	0.389	0.65	4.83079e-22	IL21-	HSPA1A
4.04329e-26	-0.356609	0.558	0.82	9.52195e-22	IL21-	DNAJB1
4.15534e-26	-0.255885	0.457	0.725	9.78583e-22	IL21-	UBE2B
4.43843e-26	-0.303463	0.409	0.687	1.04525e-21	IL21-	RNF213
1.25344e-25	-0.262228	0.726	0.881	2.95184e-21	IL21-	MIF
3.84654e-25	-0.280651	0.505	0.768	9.05861e-21	IL21-	SFPQ
4.23095e-24	1.26147	0.37	0.188	9.96389e-20	IL21-	FCER1G
4.29581e-24	-0.260752	0.522	0.762	1.01166e-19	IL21-	HMGN1
5.49522e-24	-0.452803	0.306	0.537	1.29412e-19	IL21-	HIST1H4C
6.84492e-24	-0.260587	0.506	0.764	1.61198e-19	IL21-	MYH9
8.66631e-24	-0.257149	0.43	0.693	2.04092e-19	IL21-	CNN2
9.22136e-24	-0.255499	0.46	0.745	2.17163e-19	IL21-	IQGAP1
1.08585e-23	1.09445	0.958	0.968	2.55718e-19	IL21-	FTL
1.32346e-23	-0.272601	0.658	0.846	3.11674e-19	IL21-	YWHAB
1.91646e-23	-0.277257	0.444	0.709	4.51327e-19	IL21-	CD7
7.48914e-23	-0.266778	0.804	0.915	1.76369e-18	IL21-	ARHGDIB
6.25333e-22	0.862409	0.824	0.836	1.47266e-17	IL21-	S100A6
6.76551e-22	-0.358321	0.235	0.432	1.59328e-17	IL21-	STMN1
1.07554e-19	-0.331035	0.864	0.933	2.5329e-15	IL21-	ACTG1
3.11749e-19	-0.289266	0.745	0.873	7.34168e-15	IL21-	HMGB1
3.8177e-19	-0.299708	0.602	0.808	8.99067e-15	IL21-	TPI1
4.37097e-15	1.24982	0.347	0.22	1.02936e-10	IL21-	CST3
1.85361e-13	-0.280392	0.185	0.327	4.36525e-09	IL21-	CCL4L2
9.30671e-13	1.6108	0.308	0.194	2.19173e-08	IL21-	LYZ
1.72848e-11	0.982854	0.268	0.156	4.07058e-07	IL21-	CD68
4.12478e-10	0.327414	0.819	0.879	9.71385e-06	IL21-	CYBA
2.78144e-09	0.87606	0.277	0.188	6.55029e-05	IL21-	AIF1
3.16062e-09	0.565164	0.274	0.186	7.44327e-05	IL21-	C1orf162
4.20843e-09	0.400884	0.657	0.687	9.91086e-05	IL21-	EMP3
8.11805e-09	0.685172	0.324	0.257	0.00019118	IL21-	ASAH1
1.25952e-08	0.541293	0.55	0.584	0.000296616	IL21-	GSTP1
1.84337e-08	0.289504	0.86	0.903	0.000434114	IL21-	MT-ND4
2.87735e-08	0.535953	0.258	0.174	0.000677617	IL21-	PLEK
2.88781e-08	-0.276588	0.525	0.699	0.000680078	IL21-	TUBA1B
6.01655e-08	-0.354153	0.402	0.562	0.0014169	IL21-	TUBB
7.34121e-08	0.605693	0.184	0.307	0.00172885	IL21-	MT1E
1.30294e-07	0.35084	0.744	0.804	0.00306842	IL21-	MYL12A
2.6747e-07	0.330686	0.187	0.315	0.00629892	IL21-	GCHFR
1.02049e-06	0.870768	0.423	0.436	0.0240326	IL21-	CTSS
3.20811e-06	0.85795	0.278	0.226	0.075551	IL21-	GRN
5.11299e-06	0.660899	0.404	0.4	0.120411	IL21-	NPC2
5.79135e-06	0.452679	0.341	0.527	0.136386	IL21-	CTSB
8.15473e-06	1.38691	0.297	0.251	0.192044	IL21-	GNLY
1.16684e-05	0.41712	0.365	0.545	0.274791	IL21-	SOD2
2.17342e-05	0.892836	0.3	0.259	0.511841	IL21-	IFITM3
5.32061e-05	0.385767	0.676	0.782	1	IL21-	GABARAP
9.99133e-05	0.388095	0.405	0.584	1	IL21-	HLA-DRB5
0.00014195	0.441314	0.206	0.301	1	IL21-	CCL3
0.000187123	0.258227	0.743	0.842	1	IL21-	ITM2B
0.000195225	0.485134	0.374	0.558	1	IL21-	HLA-DQB1
0.000261339	0.456971	0.235	0.343	1	IL21-	AREG
0.000454613	0.397367	0.583	0.626	1	IL21-	LGALS1
0.000558269	0.379096	0.2	0.295	1	IL21-	ACP5
0.000650755	0.27012	0.36	0.531	1	IL21-	TKT
0.000892142	0.306312	0.645	0.681	1	IL21-	LITAF
0.00242182	0.730743	0.537	0.651	1	IL21-	PSAP
0.00442514	0.68099	0.358	0.37	1	IL21-	CTSW
0.00604028	0.280718	0.181	0.261	1	IL21-	MATK
0.00887386	0.596576	0.383	0.547	1	IL21-	LGALS3
