# Supplementary figures and images for: Single-cell Profiling of Immune cells After Neoadjuvant Pembrolizumab and Chemotherapy in ⅢA non-small cell lung cancer (NSCLC)
Source: Research Square preprint supplement (doi:10.21203/rs.3.rs-952662/v1), 2021-10-12

FoxP3

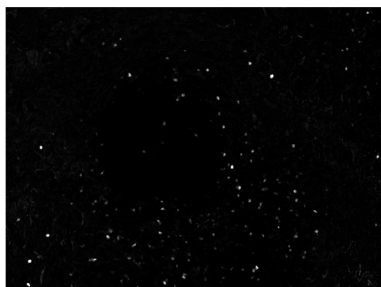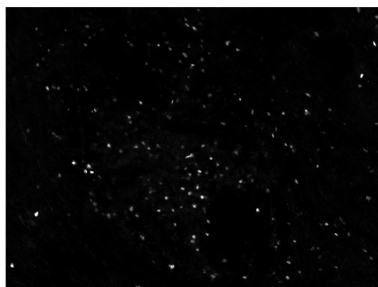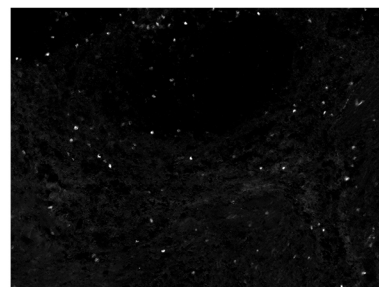

CD21

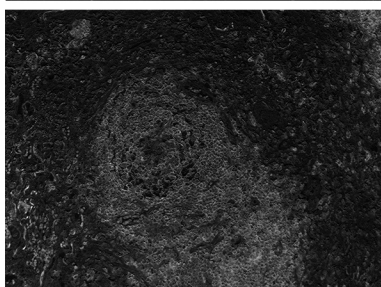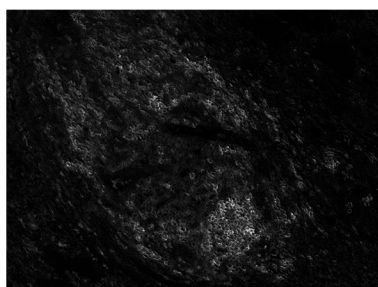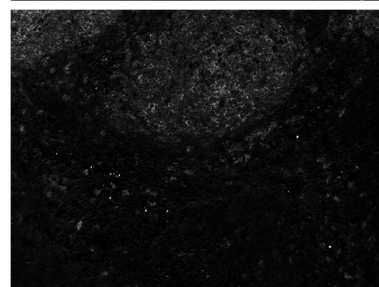

CD4

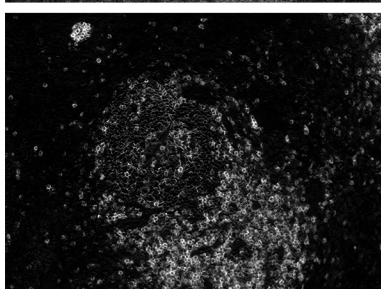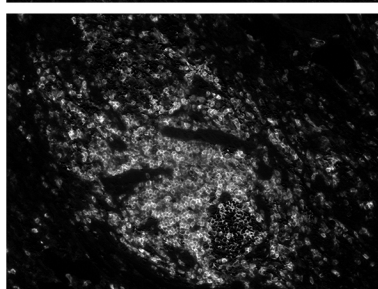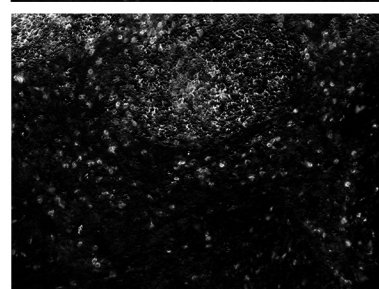

IL-21

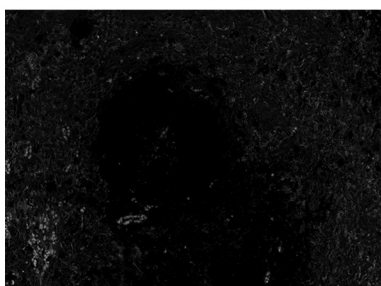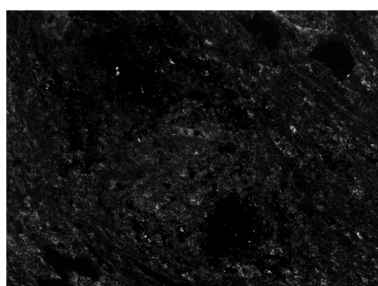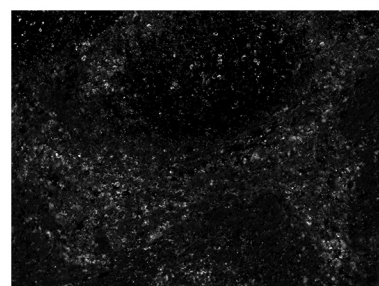

CD20

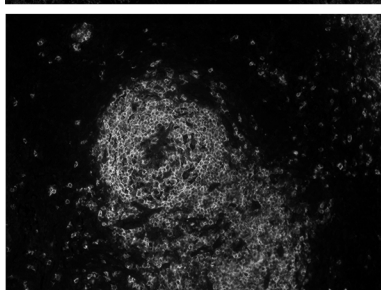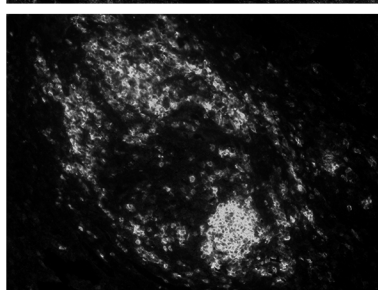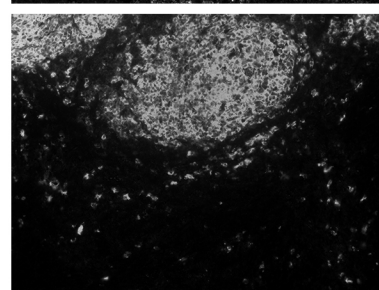

IgG

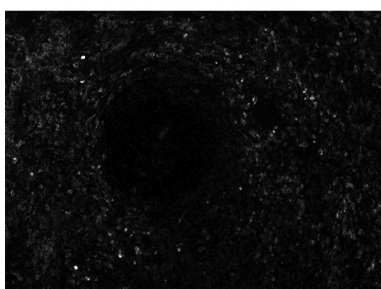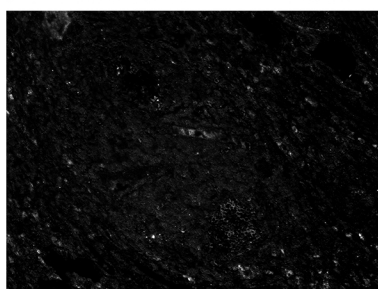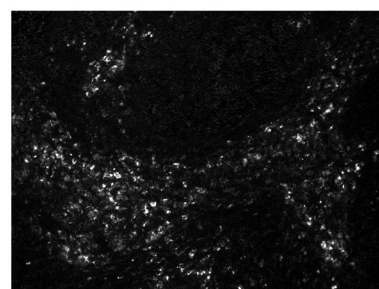

Merged

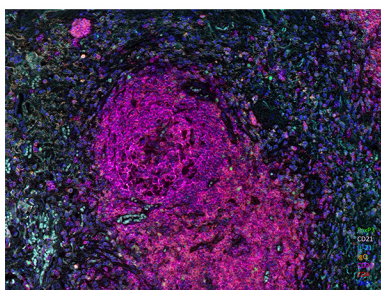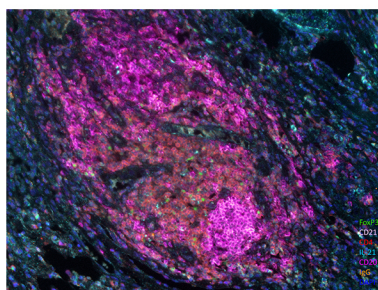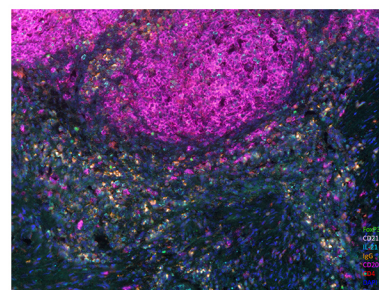

Supplement: Supplementary file 1 [file c3d756d40c94937ce1beb42b.pdf]

CD20

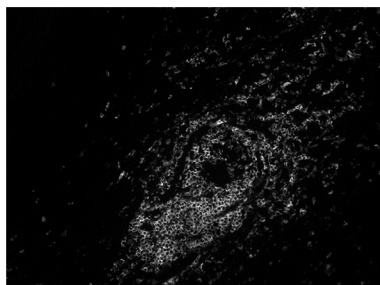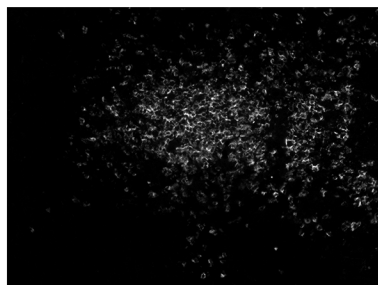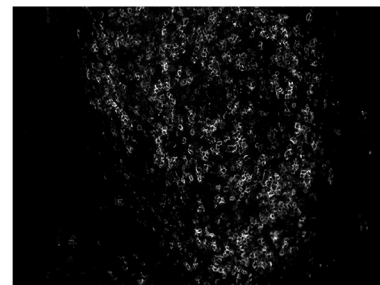

IgG1

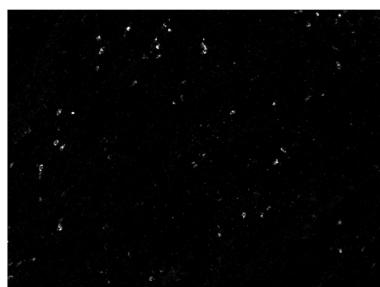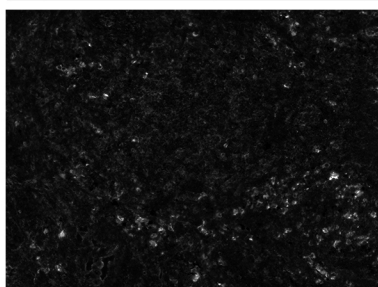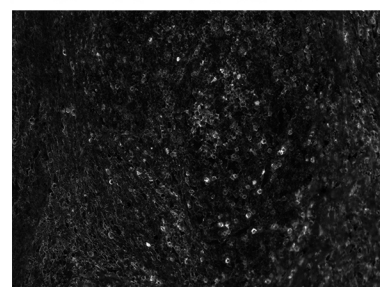

IgG3

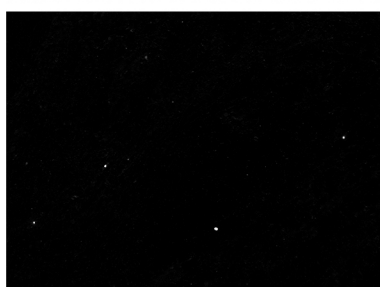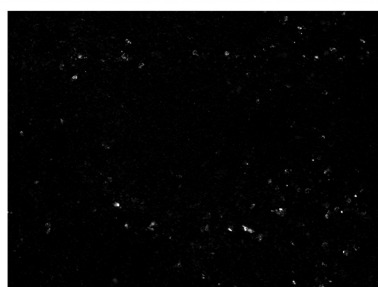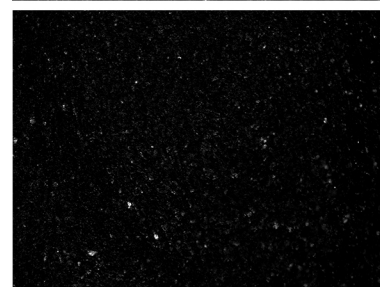

IgA

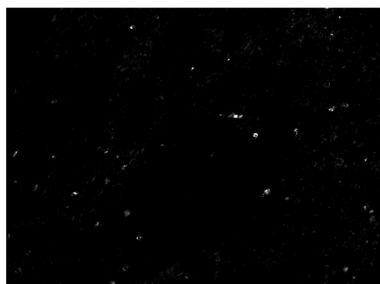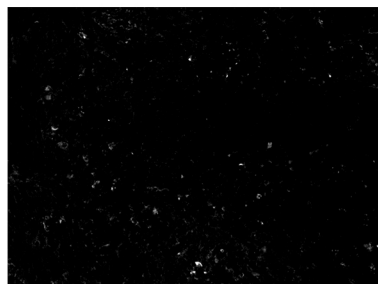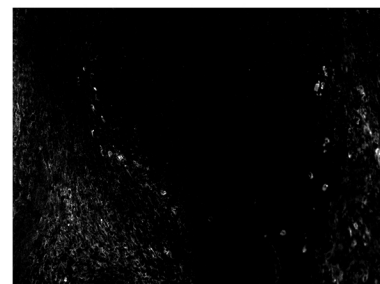

CD4

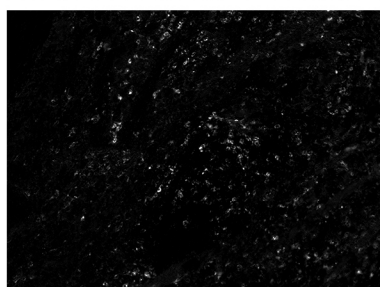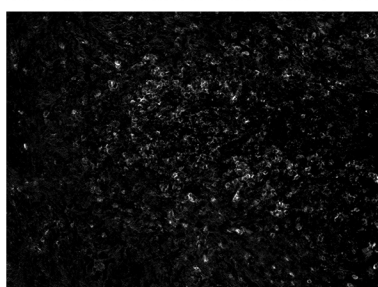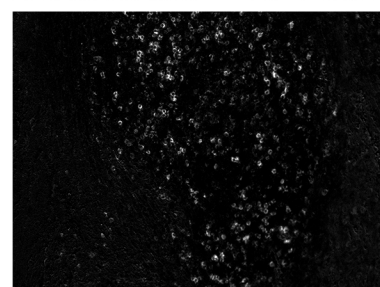

IL-21

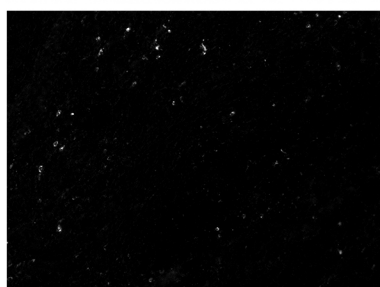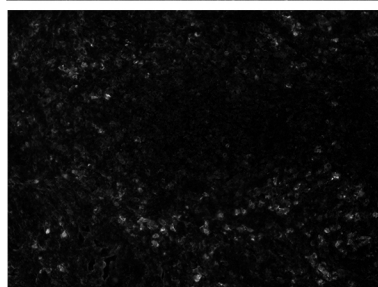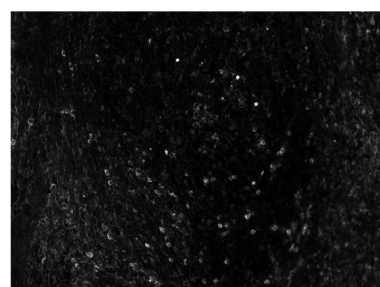

Merged

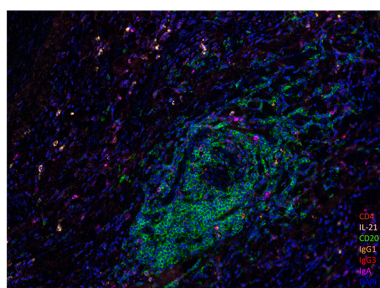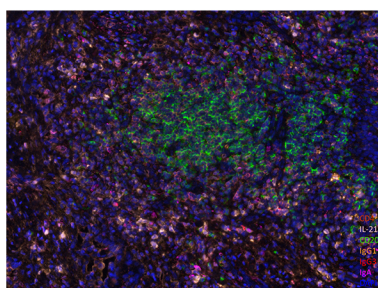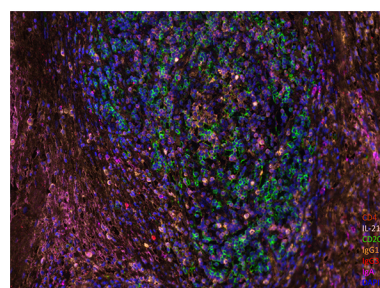

Supplement: Supplementary file 2 [file c9e6a955631462ef3521b971.pdf]
